1    **Construction of a complete set of *Neisseria meningitidis* defined mutants – the**  
2    **NeMeSys 2.0 collection – and its use for the phenotypic profiling of the**  
3    **genome of an important human pathogen**

4

5    Alastair Muir<sup>1</sup>, Ishwori Gurung<sup>1</sup>, Ana Cehovin<sup>1</sup>, Adelme Bazin<sup>2</sup>, David Vallenet<sup>2</sup>,  
6    Vladimir Pelicic<sup>1,\*</sup>

7

8    <sup>1</sup>MRC Centre for Molecular Bacteriology and Infection, Imperial College London,  
9    London, United Kingdom.

10

11    <sup>2</sup>LABGeM, Génomique Métabolique, CEA, Genoscope, Institut François Jacob,  
12    Université d'Evry, Université Paris-Saclay, CNRS, Evry, France.

13

14    \*Corresponding author

15    email: v.pelicic@imperial.ac.uk

## 16    **Abstract**

17    One of the great challenges in biology is to determine the function of millions of  
 18    genes of unknown function. Even in model bacterial species, there is a sizeable  
 19    proportion of such genes, which has fundamental and practical consequences. Here,  
 20    we constructed a complete collection of defined mutants in protein-coding genes –  
 21    named NeMeSys 2.0 – in the human pathogen *Neisseria meningitidis*, consisting of  
 22    individual mutants in 1,584 non-essential genes. This effort identified 391 essential  
 23    genes – broadly conserved in other bacteria – leading to a full overview of the  
 24    essential meningococcal genome, associated with just four underlying basic  
 25    biological functions: 1) expression of genome information, 2) preservation of genome  
 26    information, 3) cell membrane structure/function, and 4) cytosolic metabolism.  
 27    Subsequently, we illustrated the utility of the NeMeSys 2.0 collection for determining  
 28    gene function by identifying 1) a novel and conserved family of histidinol-  
 29    phosphatase, 2) 20 genes, including three new ones, involved in the biology of type  
 30    IV pili, a widespread virulence factor, and 3) several conditionally essential genes  
 31    found in regions of genome plasticity encoding antitoxins and/or immunity proteins,  
 32    which become dispensable when the gene encoding the cognate toxin is deleted.  
 33    These findings have implications beyond the meningococcus. The NeMeSys 2.0  
 34    collection is an invaluable resource paving the way for a global phenotypic landscape  
 35    in a major human bacterial pathogen.

## 36 Introduction

37 Low-cost massively parallel sequencing methods have transformed biology, with  
 38 availability of complete genome sequences increasing exponentially. In bacteria,  
 39 genome sequences can be determined for hundreds of isolates in parallel in just a  
 40 matter of days. For bacterial pathogens, genome sequences are often available for  
 41 thousands of clinical isolates, and represent a key resource for epidemiology and  
 42 comparative genomics<sup>1</sup>. This explosion has also led to the identification of millions of  
 43 new genes, with the important insight that many are of unknown function. Even in a  
 44 model species such as *Escherichia coli* K-12, perhaps the most thoroughly studied  
 45 biological entity, only 60 % of 4,623 protein-coding genes have experimentally  
 46 verified functions<sup>2</sup>, while 35 % have either no predicted function, or a predicted  
 47 function that is yet to be verified<sup>2</sup>. In less well studied species, this partition is  
 48 dramatically skewed towards the latter class, with an overwhelming majority of genes  
 49 having predicted but not experimentally verified functions, or no predicted function at  
 50 all. This indicates that there are still major gaps in our understanding of basic  
 51 bacterial physiology, including for well-studied metabolic pathways<sup>3</sup>. This has  
 52 fundamental consequences for systems and synthetic biology, by hindering holistic  
 53 understanding of the life-supporting functions and processes allowing bacteria to  
 54 grow and replicate. It also has practical consequences by slowing down the  
 55 identification of new means for controlling bacterial pathogens, which are needed  
 56 more than ever in this era of antimicrobial resistance. Therefore, developing methods  
 57 for systematically elucidating gene function is a critical biological endeavour.

58 Molecular genetics, which involves the creation and phenotypic analysis of  
 59 large collections of mutants, is the most direct path to determining gene function on a  
 60 genome scale by providing a crucial link between phenotype and genotype. In many  
 61 bacteria, genome-wide mutant collections in protein-coding genes have been  
 62 constructed using either targeted mutagenesis or random transposon (Tn)  
 63 mutagenesis. Because of its time and cost-effectiveness, Tn mutagenesis is more

64 widely used<sup>4-6</sup>, especially since it has been coupled with massively parallel  
 65 sequencing of Tn insertion sites (Tn-Seq)<sup>7</sup>, which allows simultaneous monitoring of  
 66 the fitness in pools of hundreds of thousands of mutants<sup>8,9</sup>. However, Tn-Seq is not  
 67 without drawbacks. 1) Not all intragenic Tn insertions lead to a loss of function. 2)  
 68 Some properties cannot be assessed in a pooled assay format. 3) Specific mutants  
 69 cannot be recovered from pools for further individual study. 4) Libraries of Tn mutant  
 70 are never complete, no matter how large. In contrast, complete collections of mutants  
 71 constructed by targeted mutagenesis do not suffer from these limitations, but their  
 72 construction is laborious and expensive. For this reason, such collections are  
 73 available for only a handful of bacterial species: the model Gram-negative *E. coli* K-  
 74 12 (Gammaproteobacteria)<sup>10</sup>, the model Gram-positive *Bacillus subtilis* (Firmicute)<sup>11</sup>,  
 75 *Acinetobacter baylyi* (Gammaproteobacteria) studied for its metabolic properties and  
 76 possible biotechnological applications<sup>12</sup>, and *Streptococcus sanguinis* (Firmicute) an  
 77 opportunistic pathogen causing infective endocarditis<sup>13</sup>. The utility of such resources  
 78 is best exemplified by a large-scale study using the Keio collection of approx. 4,000  
 79 mutants in *E. coli* K-12, which identified mutants presenting altered colony size upon  
 80 growth in more than 300 different conditions<sup>14</sup>. More than 10,000 phenotypes were  
 81 identified for approx. 2,000 mutants, including many in genes of unknown function<sup>14</sup>.  
 82 Another major advantage of mutant collections constructed by targeted mutagenesis  
 83 is that they also reveal complete lists of essential genes, those that cannot be  
 84 mutated because their loss is lethal. These genes that encode proteins essential for  
 85 cellular life, many of which are expected to be common to all living organisms<sup>15</sup>, have  
 86 attracted particular interest because they are expected to shed light on the origin of  
 87 life. Additionally, essential genes specific to bacteria are also interesting because  
 88 they are prime targets for the design of new drugs to tackle antimicrobial resistance.

89 Since the few species in which complete collections of mutants have been  
 90 constructed represent only a tiny fraction of bacterial diversity, additional complete  
 91 collections of mutants in diverse species are needed to tackle more effectively the



challenge of genes of unknown function. Human bacterial pathogens are particularly attractive candidates for this venture because of the potential practical implications for human health. Among these, *Neisseria meningitidis* – a Gram-negative Betaproteobacteria causing life-threatening meningitis and sepsis – stands out as an ideal candidate for several reasons. 1) It has a small genome with approx. 2,000 protein-coding genes, and yet displays a robust metabolism allowing rapid growth (doubling time of 40 min), even on minimal medium. 2) It has been the subject of intensive investigation for decades and there are several thousand publicly available meningococcal genome sequences. 3) It is naturally competent, which makes it a model for molecular genetics. Previously, we have used these advantages to design a modular toolbox for *Neisseria meningitidis* systematic analysis of gene function, named NeMeSys<sup>16</sup>. The central module of NeMeSys was an ordered library of approx. 4,500 Tn mutants in which the Tn insertion sites were sequence-defined<sup>16,17</sup>, revealing insertions in more than 900 genes<sup>16</sup>.

In the present study, we have 1) used the original library of Tn mutants as a starting point to generate a complete collection of defined mutants in *N. meningitidis* – named NeMeSys 2.0 – comprising one mutant in each non-essential protein-coding gene, 2) defined and analysed in depth the essential meningococcal genome, and 3) illustrated the potential of NeMeSys 2.0 for the phenotypic profiling of the meningococcal genome by identifying the function of multiple genes of unknown function.

# Results and Discussion

## Construction of the complete NeMeSys 2.0 collection of meningococcal mutants

The present study gave new impetus to a systematic re-annotation of the genome of *N. meningitidis* 8013 published in 2009<sup>16</sup>. We took into account new information in the public databases, new publications, an RNA-Seq analysis performed in 8013<sup>18</sup>, and findings in the present study. In brief, we dropped one previously annotated gene, updated the gene product annotations of 521 genes, added 69 non-coding RNAs, and changed 176 gene start sites. The genome of *N. meningitidis* 8013 contains 2,060 protein-coding genes (labelled NMV\_). In parallel, we re-sequenced the genome of the 8013 wild-type (WT) strain by Illumina whole genome sequencing (WGS), which confirmed the accuracy of the original genome sequence determined by Sanger sequencing more than 12 years ago<sup>16</sup>, with an error rate of approx. 1 per 134,000 bases. We identified 17 differences with the published sequence, which are likely to be genuine since they were also found in the few mutants that were verified by WGS (see below). Of these differences, 11 correspond to single-nucleotide polymorphisms, five are single-nucleotide indels, and one is the deletion of a GT dinucleotide within a repeated GT tract in NMV\_0677, which therefore corresponds to a phase variation event<sup>19</sup>.

In keeping with previous studies describing the construction of complete collections of mutants<sup>10-13</sup>, 85 genes (4.1 %) were not considered to be meaningful targets for mutagenesis (Fig. 1) because they encode transposases for repeated insertion sequences, or they correspond to short remnants of truncated genes and/or non-expressed cassettes (Supplementary Table 1). We therefore set out to assemble a complete collection of mutants in the remaining 1,975 genes (95.9 %) following a two-step approach described below. In brief, we first selected a subset of suitable Tn

140 mutants from the NeMeSys library, and then systematically mutagenised the  
141 remaining target genes by allelic exchange (Supplementary Fig. 1).

142 First, since we previously constructed an arrayed library of Tn mutants in strain  
143 8013 in which Tn insertion sites were sequence-defined<sup>16,17</sup>, we selected a subset of  
144 suitable mutants from this library. Specifically, mutations with a Tn insertion closer to  
145 the centre of the genes (excluding the first and last 15 % that are often not gene-  
146 inactivating) (Supplementary Fig. 1) were first re-transformed into strain 8013, which  
147 is naturally competent. After extraction of the genomic DNA of the transformants, we  
148 PCR-verified that they contained a Tn inserted in the expected target gene using  
149 suitable pairs of flanking primers (Supplementary Table 2). We thus selected a  
150 subset of 801 Tn mutants (40.6 % of target genes), harbouring Tn insertions  
151 expected to be gene-inactivating (Fig. 1) (Supplementary Table 3). As a control,  
152 Illumina WGS of one mutant, in *nlaB*, confirmed that it contained the expected  
153 mutation, a Tn inserted after a TA dinucleotide at position 2,157,750 in the genome.

154 Next, we set out to systematically mutagenise the remaining 1,174 target  
155 genes (59.4 %) by allelic exchange. For this, we used a previously validated no-  
156 cloning mutagenesis method<sup>20</sup>, based on splicing PCR (sPCR), to construct non-  
157 polar mutants in which a central portion of the target gene (between the first and last  
158 30 %) would be deleted and replaced by the same kanamycin (Km) resistance  
159 cassette present in the above Tn (Supplementary Fig. 1). In brief, three PCR  
160 products were first amplified, corresponding to the Km cassette and regions  
161 upstream and downstream target genes. For failed reactions, we undertook as many  
162 rounds of primer design as needed, until all PCRs were successful. The three PCR  
163 products were then combined and spliced together. The final sPCR product was  
164 transformed directly into *N. meningitidis* 8013. Typically, for non-essential genes, we  
165 obtained hundreds of colonies resistant to kanamycin (Km<sup>R</sup>). For each successful  
166 transformation, two Km<sup>R</sup> colonies were isolated and PCR-verified to contain the  
167 expected mutation. To minimise false positive identification of essential genes, each

168 transformation that yielded no transformants was repeated at least three times with  
169 different sPCR products. Only when all transformations failed to yield transformants,  
170 was the target gene deemed to be essential. In summary (Fig. 1), out of the 1,174  
171 genes that were targeted, we could disrupt 783 (Supplementary Table 3), while 391  
172 could not be mutated and are thus essential for growth on rich medium  
173 (Supplementary Table 4). As above, WGS of a few mutants constructed by sPCR, in  
174 *Int*, *tatB* and *secB*, confirmed that each contained the expected mutation.

175 Taken together, using the above two-step approach, we constructed a  
176 comprehensive set of 1,584 defined mutants in strain 8013, named the NeMeSys 2.0  
177 collection. In addition, we also identified 391 candidate essential genes (19 % of all  
178 protein-coding genes), which are required for growth of the meningococcus on rich  
179 medium. For each gene that was successfully mutated, one mutant was stored at -  
180 80°C in glycerol, while the corresponding genomic DNA was stored at -20°C. This  
181 allows for easy distribution of mutants to the community and/or re-transformation of  
182 the corresponding mutations in 8013, other meningococcal strains, or even  
183 genetically closely related species like the gonococcus, which share most of their  
184 genome with the meningococcus.

185

## 186 **In depth analysis of the meningococcal essential genome**

187 Considering their fundamental and practical importance, we first focused on the 391  
188 genes essential for meningococcal life. Since corresponding proteins are expected to  
189 be broadly conserved, we determined the partition of the 391 essential genes  
190 between conserved and variable genomes in meningococci. To do this, we first used  
191 the recently described PPanGGOLiN software<sup>21</sup> – an expectation-maximisation  
192 algorithm based on multivariate Bernoulli mixture model coupled with a Markov  
193 random field – to compute the pangenome of *N. meningitidis*, based on complete  
194 genome sequences of 108 meningococcal isolates available in RefSeq  
195 (Supplementary Table 5). We thereby classified genes in three categories<sup>21</sup>,

196 persistent (gene families present in almost all genomes), shell (present at  
197 intermediate frequencies), or cloud (present at low frequency). We then determined  
198 how the 2,060 protein-coding genes of *N. meningitidis* 8013 partitioned between  
199 these three classes (Supplementary Table 5). Only 1,664 genes (80.8 %) belong to  
200 the persistent genome, while 396 genes (19.2 %) correspond to gene families  
201 present at intermediate/low frequency in meningococci since they are part of the shell  
202 (241 genes) and cloud genomes (155 genes) (Fig. 2a). Critically, besides highlighting  
203 the well-known genomic plasticity of this naturally competent species, this analysis  
204 confirmed our original prediction by revealing that essential genes are  
205 overwhelmingly conserved in meningococcal isolates. Indeed, 382 essential genes  
206 (97.4 %) are part of the persistent meningococcal genome (Fig. 2b) (Supplementary  
207 Table 5). Of the remaining nine essential genes, six are part of the shell genome,  
208 while three belong to the cloud genome (Supplementary Table 5).

209 Furthermore, many meningococcal essential genes (30.2 %) are conserved  
210 and essential in other bacteria where systematic mutagenesis efforts have been  
211 performed (Fig. 3a), including in phylogenetically distant species such as *S.*  
212 *sanguinis* (Supplementary Table 6)<sup>10,12,13</sup>. When conservation was assessed with  
213 Proteobacteria only (*E. coli* and *A. baylyi*), which are more closely related to *N.*  
214 *meningitidis*, half of the 391 essential meningococcal genes (195 in total) are  
215 conserved and essential in these three Gram-negative species (Fig. 3a).  
216 Interestingly, a similar proportion of meningococcal essential genes (175 in total) was  
217 conserved in JCVI-syn3.0 (Fig. 3b) (Supplementary Table 7), a synthetic  
218 *Mycoplasma mycoides* bacterium engineered with a minimal genome<sup>22</sup> smaller than  
219 that of any naturally occurring autonomously replicating cell. Taken together, these  
220 observations are consistent with the notion that a sizeable portion of the genome  
221 essential for cellular life is widely conserved in bacteria.

222 Next, to have a more global understanding of the biological functions that are  
223 essential in the meningococcus, we analysed the distribution of the 391 essential

genes in functional categories (Supplementary Table 8). Genes were classified in specific functional categories using the bioinformatic tools embedded in the MicroScope platform<sup>23</sup>, which hosts NeMeSys 2.0. In particular, we used predictions from MultiFun<sup>24</sup>, MetaCyc<sup>25</sup>, eggNOG<sup>26</sup>, COG<sup>27</sup>, FIGfam<sup>28</sup>, and/or InterProScan<sup>29</sup>. As can be seen in Table 1, the essential meningococcal genes could be distributed in a surprisingly limited number of pathways (Table 1). In keeping with expectations, many essential genes are involved in key cellular processes such as 1) transcription (11 genes encoding subunits of the RNA polymerase, a series of factors modulating transcription, and two transcriptional regulators), 2) RNA modification/degradation (19 genes), and 3) protein biosynthesis (120 genes) (Table 1). The large class of genes involved in protein biosynthesis encode 1) all 24 proteins involved in tRNA charging, 2) virtually all ribosomal proteins (51/56), 3) five proteins involved in ribosome biogenesis/maturation, 4) 10 factors modulating translation, 5) two enzymes introducing post-translational modifications in proteins, 6) seven factors facilitating protein folding, and 7) 21 factors involved in protein export (signal peptidase, Lol system involved in lipoprotein export, general secretion Sec system, Tat translocation system, and TAM translocation and assembly module specific for autotransporters) (Table 1). Furthermore, many other essential genes encode proteins involved in additional key processes such as 1) genome replication and maintenance (20 proteins including subunits of the DNA polymerase, topoisomerases, gyrase, ligase *etc.*), 2) cell division (13 proteins), 3) peptidoglycan cell wall biogenesis (17 proteins), and 4) membrane biogenesis (37 proteins) (Table 1). The latter class includes all 12 proteins required for fatty acid biosynthesis, eight proteins required for the biosynthesis of phospholipids (phosphatidylethanolamine (PE) and phosphatidylglycerol (PG)), and 17 proteins involved in the biosynthesis and export of the lipo-oligosaccharide (LOS), which constitutes the external leaflet of the outer membrane. Finally, most of the remaining genes of known function (Table 1) are involved in energy generation, production of key metabolic intermediates (such

as dihydroxyacetone phosphate (DHAP), or 5-phosphoribosyl diphosphate (PRPP) and a variety of metabolic pathways leading to the biosynthesis of 1) vitamins (B1, B2, B6, and B9), 2) nucleotides, 3) amino acids (notably *meso*-diaminopimelate (MDAP) a component of the peptidoglycan), 4) isoprenoid, 5) heme, 6) CoA/ac-CoA, 7) NAD/NADP, 8) iron-sulfur (Fe-S) clusters, 9) ubiquinol, 10) lipoate, and 11) S-adenosyl-methionine (SAM). Many of these compounds are cofactors and/or coenzymes known to be essential for the activity of many bacterial enzymes.

When essential genes were further integrated into networks and metabolic pathways – using primarily MetaCyc<sup>25</sup> – the above picture became dramatically simpler. As many as 91.3 % of the meningococcal essential genes partitioned into just four major functional categories (Fig. 4). Namely, 1) gene/protein expression, 2) genome/cell replication, 3) membrane/cell wall biogenesis, and 4) cytosolic metabolism. Strikingly, for most multi-step enzymatic pathways, most, and often all, the corresponding genes were identified as essential (Fig. 5), although they are most often scattered throughout the genome. We view this as an important quality control of our library. Only 34 essential genes (8.7 %) could not be clearly assigned to these four categories. Critically, this functional partition is coherent with the one previously determined for the minimal synthetic bacterium JCVI-syn3.0<sup>22</sup>. As a result, we were able to generate a concise overview of the meningococcal essential genome in the context of the cell (Fig. 5), in which many of the above pathways are detailed and often linked by critical metabolic intermediates. This overview provides a useful blueprint for systems and synthetic biology and a global understanding of meningococcal biology.

# **Essential genes that are part of the variable genome are conditionally essential**

A puzzling finding was that some essential genes, which could not be assigned to the above four functional groups, are part of shell/cloud genomes present at intermediate/low frequency in the meningococcus (Supplementary Table 5).

280 Interestingly, many of the corresponding genes are located in regions of genome  
281 plasticity (RGP) – often thought to have been acquired by horizontal gene transfer –  
282 as confirmed by the novel predictive method panRGP<sup>30</sup> that identifies RGP using  
283 pangenome data generated by PPanGGOLiN<sup>21</sup>. A panRGP analysis identified 32  
284 RGP in the genome of strain 8013, encompassing a total of 348,885 bp (15.3 % of  
285 the genome) (Supplementary Table 9). Interestingly, one of these genes offered a  
286 plausible explanation to the apparent paradox of essential genes that are not part of  
287 the persistent meningococcal genome. NMV\_2289 is predicted to encode a DNA-  
288 methyltransferase, based on the presence of a DNA methylase N-4/N-6 domain  
289 (InterPro IPR002941). Since the neighbouring NMV\_2288 is predicted to encode a  
290 restriction enzyme, the probable role of the NMV\_2289 methyltransferase is to  
291 protect meningococcal DNA against degradation by this restriction enzyme. This  
292 would explain the lethal phenotype of the  $\Delta$ NMV\_2289 mutant. A closer examination  
293 of the other essential genes that are part of shell/cloud genomes and often found in  
294 RGP suggests that a similar scenario might be often applicable. We noticed that  
295 NMV\_1478, which encodes a protein of unknown function in RGP\_2, is likely to be  
296 co-transcribed with NMV\_1479 that is predicted to encode the toxin of a toxin-  
297 antitoxin (TA) system<sup>31</sup> (Fig. 6a). Therefore, since a toxin and its cognate antitoxin  
298 are often encoded by closely linked genes, we hypothesized that NMV\_1478 might  
299 be the antitoxin for the neighbouring NMV\_1479 toxin. This would explain why  
300 NMV\_1478 is essential, *i.e.* in its absence the NMV\_1479 toxin would kill the cell. If  
301 this is true, we reasoned that it should be possible to delete NMV\_1478 together with  
302 NMV\_1479, which was attempted. As predicted, in contrast to NMV\_1478 which  
303 could not be deleted individually despite repeated attempts, a double deletion mutant  
304  $\Delta$ NMV\_1478/1479 could be readily obtained (Fig. 6a). This confirms that the  
305 NMV\_1478 gene is essential only when the toxin product of NMV\_1479 is also  
306 present. Such a scenario was also tested for NMV\_0559, which is found in a large  
307 RGP of 86.8 kbp (RGP\_0), encompassing genes NMV\_0527 to NMV\_0618/0619



(Fig. 6b). We named this RGP *tps* because it contains multiple *tpsA* genes predicted to encode large haemagglutinin/haemolysin-related proteins of two partner secretion systems<sup>32</sup>. Since NMV\_0559 is the only essential gene in the *tps* RGP, we tested whether it might be conditionally essential by attempting to delete most of RGP\_0. As predicted, while NMV\_0559 could not be deleted on its own despite repeated attempts, an 80 kbp  $\Delta$ *tps* deletion in RGP\_0 encompassing NMV\_0559 could be readily obtained (Fig. 6b). This suggests that NMV\_0559 is essential only in the presence of another gene in RGP\_0, which remains to be identified. We predict that several other essential genes of unknown function that are not part of the persistent meningococcal genome may be similarly conditionally essential, including 1) NMV\_1305 and NMV\_1310 part of a putative prophage (RGP\_1), 2) NMV\_1541 the putative antitoxin for neighbouring NMV\_1539 toxin, 3) NMV\_1544 putative antitoxin for neighbouring NMV\_1543 toxin, 4) NMV\_1761 putative immunity protein against neighbouring MafB toxins (RGP\_4), which represent a newly identified family of secreted toxins in pathogenic *Neisseria* species<sup>33</sup>, 5) NMV\_1918 part of a second *tps* RGP (RGP\_7), 6) NMV\_2010 the putative immunity protein against neighbouring bacteriocins (RGP\_3), and 7) NMV\_2333 and NMV\_2335 putative immunity proteins in a second *maf* RGP (RGP\_11).

326

### 327 **Filling holes in metabolic pathways: identification of a novel and widespread** 328 **histidinol-phosphatase**

329 Another major utility of the NeMeSys 2.0 collection of mutants is to determine the  
330 function of genes of unknown function by reverse genetics. We therefore wished to  
331 illustrate this aspect. We noticed that the 10-step metabolic pathway leading to  
332 histidine biosynthesis presents an apparent "hole" (Fig. 7a). The "missing" enzyme in  
333 8013 corresponds to histidinol-phosphatase (EC 3.1.3.15), which catalyses the  
334 dephosphorylation of histidinol-P into histidinol (Fig. 7a). The meningococcal genome  
335 does not have homologs of known histidinol-phosphatases<sup>34</sup>, a feature it shares with

many other bacterial species according to MetaCyc<sup>25</sup>. First, we excluded the possibility that the meningococcus might be auxotrophic for histidine by showing that 8013 can grow on M9 minimal medium without added histidine (Fig. 7b). Next, we sought to identify the unknown histidinol-phosphatase using NeMeSys 2.0, by specifically testing mutants in genes encoding putative phosphatases of unknown function, in search of a mutant that would not grow on M9 without added histidine. Using this approach, we identified  $\Delta$ NMV\_1317 as a histidine auxotroph, growing on M9 plates only when histidine was added (Fig. 7b). The product of this gene was annotated as a putative hydrolase of unknown function, belonging to the IB subfamily of the haloacid dehalogenase superfamily of aspartate-nucleophile hydrolases (IPR006385). The corresponding sequences include a variety of phosphatases none of which is annotated as a histidinol-phosphatase. Complementation of  $\Delta$ NMV\_1317 mutant with NMV\_1317 restored growth on M9 without added histidine (Fig. 7b), confirming that the auxotrophic phenotype was due to the mutation in NMV\_1317. To confirm that NMV\_1317 encodes the missing enzyme in histidine biosynthesis, we performed a cross-species complementation assay with the *hisB* gene from *E. coli* DH5 $\alpha$  (*hisB<sub>EC</sub>*), which encodes a histidinol-phosphatase unrelated to NMV\_1317. Complementation of  $\Delta$ NMV\_1317 with *hisB<sub>EC</sub>* restored growth on M9 without added histidine (Fig. 7b). Complementation was gene specific, since *hisB<sub>EC</sub>* could not complement the growth deficiency of a different histidine auxotrophic mutant in NMV\_1778 (*hisH*) (Fig. 7b). Together, these results show that NMV\_1317 defines a previously unrecognised class of histidinol-phosphatases, allowing us to fill a hole in the histidine biosynthesis pathway in the meningococcus. This finding, which illustrates the utility of NeMeSys 2.0 for annotating genes of unknown function by reverse genetics, has implications for other species lacking known histidinol-phosphatases. Indeed, NMV\_1317 homologs are widespread in Betaproteobacteria and Gammaproteobacteria in which no histidinol-phosphatase has been identified according to MetaCyc<sup>25</sup>. We expect that NMV\_1317 homologs will encode the

364 elusive histidinol-phosphatase in a variety of Burkholderiales and Pseudomonadales,  
365 including many pathogenic species of *Bordetella*, *Pseudomonas*, and *Burkholderia*  
366 (there is some evidence for this in *Burkholderia phytofirmans*<sup>35</sup>).

367

368 **Identification of a comprehensive set of genes involved in type IV pilus biology**  
369 **in *N. meningitidis*, including three new ones**

370 Another utility of NeMeSys 2.0 we wished to illustrate is the possibility to perform  
371 whole-genome phenotypic screens to identify all the genes responsible for a  
372 phenotype of interest. We chose to focus on type IV pili (T4P), which are pivotal  
373 virulence factors in the meningococcus<sup>36</sup>, for two reasons. First, T4P, are ubiquitous  
374 in prokaryotes, which has made them a hot topic for research for the past 40 years<sup>37</sup>.  
375 Second, although many aspects of T4P biology remain incompletely understood,  
376 most genes composing the multi-protein machinery involved in the assembly of these  
377 filaments and/or their multiple functions have been identified, including in the  
378 meningococcus that is one of the mainstream T4P models<sup>36</sup>. Hence, we could readily  
379 benchmark the results of our screen against previous mutational analyses, especially  
380 for the recovery rate of expected mutants. The two T4P-linked phenotypes we  
381 decided to study are the formation of bacterial aggregates and twitching motility. Both  
382 phenotypes can be simultaneously assessed – allowing thus a dual screen – by  
383 observing the mutants growing in liquid medium by phase-contrast microscopy<sup>38</sup>. We  
384 thus scored the 1,589 mutants for the presence of round aggregates, and for the  
385 continuous and vigorous jerky movements of cells within these aggregates, which  
386 corresponds to twitching motility<sup>38</sup> (Supplementary Table 10). This analysis revealed  
387 that 20 mutants (1.2 %) present phenotypic defects in these two T4P-linked  
388 phenotypes (Table 2). Significantly, we identified 100 % of the expected single  
389 mutants in 17 *pil* genes known to affect these phenotypes in the meningococcus<sup>38-40</sup>.  
390 This is another quality control of the NeMeSys 2.0 collection of mutants, which  
391 confirms excellent correlation between phenotype and genotype, and shows that

when a robust screening method is used all the genes involved in a given phenotype can be identified. Furthermore, we could readily identify mutants such as  $\Delta pilT$  able to form (irregular) aggregates, but showing no twitching motility<sup>38</sup>. PilT is known to encode the motor powering pilus retraction, which is directly responsible for twitching motility<sup>41</sup>. No other mutant in the library exhibited a similar phenotype. Strikingly, we also identified mutants in three genes not previously associated with T4P biology in *N. meningitidis* (Table 2), which was unexpected considering that T4P have been studied for decades in this species. TsaP has been shown in the closely related pathogen *Neisseria gonorrhoeae* to interact with the secretin PilQ<sup>42</sup>, which forms a pore in the outer membrane through which T4P translocate onto the cell surface. TsaP plays a poorly understood role in T4P biology in *N. gonorrhoeae* and *Myxococcus xanthus*<sup>42</sup>, but has apparently no role in *Pseudomonas aeruginosa*<sup>43</sup>. In addition, we identified NMV\_1205 and NMV\_2228, which to the best of our knowledge have never been previously linked to T4P biology. NMV\_1205 is predicted to encode a periplasmic protein of unknown function and is found mainly in Neisseriales, where it is widespread. NMV\_2228 is predicted to encode a carbonic anhydrase, an enzyme catalysing the reversible hydration of carbon dioxide<sup>44</sup>.

Next, we analysed the three new mutants in detail using an approach previously validated in the meningococcus with many *pil* genes<sup>38,45</sup>. We first tested whether piliation was affected in the mutants by purifying T4P using a procedure in which filaments sheared by vortexing are precipitated using ammonium sulfate<sup>38</sup>. Pilus preparations, obtained from equivalent numbers of cells, were separated by SDS-PAGE and either stained using Coomassie blue, or tested by immunoblotting using an anti-PilE antibody. This revealed the major pilin PilE as a 17 kDa species (Fig. 8a) and confirmed that all three mutants were piliated. However, when compared to the WT, pilus yields differed between the mutants. While piliation in  $\Delta NMV_2228$  was apparently normal, it was decreased in  $\Delta tsaP$  and  $\Delta NMV_1205$ . The decrease was dramatic in  $\Delta NMV_1205$ , where filaments could be detected only

by immunoblotting (Fig. 8a). Quantification of piliation using a whole-cell ELISA procedure<sup>38</sup> confirmed these findings (Fig. 8b) and showed that piliation levels were 40 %, 31 % and 154 % of WT, in  $\Delta tsaP$ ,  $\Delta NMV\_1205$  and  $\Delta NMV\_2228$ , respectively. Therefore, none of the corresponding proteins is required for T4P biogenesis.

We then further characterised the new mutants for T4P-linked functions. Since it is known that in some meningococcal mutants piliation and/or aggregation defects can be restored when filament retraction is abolished by a concurrent mutation in  $pilT$ <sup>38,45</sup>, we tested if that might be the case for the new mutants. First, we showed that aggregation, which is abolished in  $\Delta tsaP$  and  $\Delta NMV\_1205$  and dramatically affected in  $\Delta NMV\_2228$ , could be restored when mutants were complemented with the corresponding WT alleles (Fig. 9a). This confirmed that the phenotypic defects in these mutants were indeed due to the mutations in the above three genes. Similarly, some aggregation was restored in  $\Delta tsaP/\Delta pilT$  and  $\Delta NMV\_1205/\Delta pilT$  ( $\Delta NMV\_2228/\Delta pilT$  could not be constructed), which harboured a concurrent mutation in  $pilT$  that encodes the retraction motor PilT. However, aggregates were morphologically distinct from the round aggregates formed by the WT or the irregular aggregates formed by  $\Delta pilT$ . These findings suggest that  $tsaP$  and  $NMV\_1205$  participate in the formation of aggregates by counterbalancing PilT-mediated pilus retraction. Lastly, we checked whether the mutants were affected for another T4P-linked phenotype, competence for DNA uptake which makes the meningococcus naturally transformable. We quantified competence in the three mutants as previously described<sup>46</sup> by transformation to rifampicin resistance (Fig. 9b). We found that  $\Delta tsaP$  was almost as transformable as the WT,  $\Delta NMV\_1205$  showed a 26-fold decrease in transformation, while competence was completely abolished in  $\Delta NMV\_2228$  (explaining why the  $\Delta NMV\_2228/\Delta pilT$  double mutant could not be constructed). These findings show that  $tsaP$ ,  $NMV\_1205$  and  $NMV\_2228$  contribute to the fine-tuning of multiple functions mediated by T4P in *N. meningitidis*.

447 Taken together, these findings are of significance in two ways. The  
448 identification of three new genes playing a role in T4P biology (how exactly remains  
449 to be understood), will contribute to a better understanding of these filaments. This  
450 has broad implications because T4P and T4P-related filamentous nanomachines are  
451 ubiquitous in Bacteria and Archaea<sup>47</sup>. In addition, the identification of new genes  
452 contributing to phenotypes that have been extensively studied in several species for  
453 the past 30 years is unambiguous evidence of the potential of NeMeSys 2.0 to lead  
454 to a global phenotypic profiling of the meningococcal genome.

455

# 456 **Concluding remarks**

457 Here, we described the construction of a complete collection of defined mutants in *N.*  
458 *meningitidis*, which has been fully integrated in our modular NeMeSys toolbox<sup>16</sup>,  
459 accessible online in MicroScope<sup>23</sup>. Furthermore, we illustrated NeMeSys 2.0 utility for  
460 tackling the challenge of genes of unknown function, following a variety of  
461 approaches. Although they were limited at this stage to a few different biological  
462 properties, these experiments have provided new information on meningococcal  
463 biology with possible implications for many other species. They have also clearly  
464 demonstrated the potential of NeMeSys 2.0 to make a significant contribution to  
465 ongoing efforts directed towards a comprehensive understanding of a bacterial cell.  
466 Such potential is further amplified by several useful properties of *N. meningitidis* such  
467 as 1) its small genome with limited functional redundancy, which in species with  
468 larger genomes can obscure the link between phenotype and genotype, 2) its hardy  
469 nature with a robust metabolism allowing it to grow on minimal medium, 3) its  
470 taxonomy making it the first Betaproteobacteria in which a complete library of  
471 mutants is available, and 4) the fact that it is a major human pathogen, which allows  
472 addressing virulence properties absent in non-pathogenic model species. This latter  
473 point makes the meningococcus a prime model for the identification of new means

474 for controlling bacterial pathogens, which would have practical implications for human  
475 health.

476 The other major achievement in the present study is the identification of the  
477 essential meningococcal genome, comprising 391 genes that could not be disrupted.  
478 The finding that more than 90 % of these genes are associated with just four basic  
479 biological functions, helped us generate a coherent concise cellular overview of the  
480 meningococcal essential metabolism. We surmise that most, if not all, of the  
481 remaining essential genes of unknown function, which are conserved in other  
482 bacterial species, will be involved in either expression of genome information,  
483 preservation of genome information, cell membrane structure/function, or cytosolic  
484 metabolism (in particular the production of key metabolic intermediates, vitamins and  
485 crucial cofactors/coenzymes). Our cellular overview provides a useful starting point  
486 for systems biology, which together with previous genome-scale metabolic network  
487 models<sup>48,49</sup>, could help us progress towards a global understanding of meningococcal  
488 biology. This, in turn, would have widespread implications, because many of the  
489 meningococcal genes, especially the essential ones, are widely conserved.

## 490 **Materials and methods**

491

## 492 **Strains and growth conditions**

493 All the *N. meningitidis* strains that were generated and used in this study were  
 494 derived from a highly adhesive variant – sometimes called clone 12 or 2C43 – of the  
 495 clinical isolate 8013<sup>50</sup>. This serogroup C strain, which belongs to the sequence type  
 496 177 and clonal complex ST-18, has been previously sequenced<sup>16</sup>. Meningococci  
 497 were routinely grown on plates with GC agar Base (GCB) (Difco) containing 5 g/l  
 498 agar (all chemicals were from Sigma unless stated otherwise) and Kellogg's  
 499 supplements (4 g/l glucose, 0.59  $\mu$ M thiamine hydrochloride, 12.37  $\mu$ M  
 500  $\text{Fe}(\text{NO}_3)_3 \cdot 9\text{H}_2\text{O}$ , 68.4  $\mu$ M L-glutamine). Plates were incubated overnight (O/N) at  
 501 37°C in a moist atmosphere containing 5 %  $\text{CO}_2$ . Alternatively, we used agar plates  
 502 with M9 minimal medium (4 g/l glucose, 4.78 mM  $\text{Na}_2\text{HPO}_4$ , 2.2 mM  $\text{KH}_2\text{PO}_4$ , 1.87  
 503 mM  $\text{NH}_4\text{Cl}$ , 8.56 mM NaCl, 2 mM  $\text{MgSO}_4$ , 0.1 mM  $\text{CaCl}_2$ ). When required, plates  
 504 contained 100  $\mu$ g/ml kanamycin, 3  $\mu$ g/ml erythromycin, 5  $\mu$ g/ml rifampicin, 25  $\mu$ g/ml  
 505 L-histidine, and/or 0.4 mM isopropyl- $\beta$ -D-thiogalactopyranoside (IPTG) (Merck).  
 506 Strains were stored at -80°C in 10 % glycerol in liquid GC (15 g/l protease peptone  
 507 No. 3, 23 mM  $\text{K}_2\text{HPO}_4$ , 7.34 mM  $\text{KH}_2\text{PO}_4$ , 85.6 mM NaCl). *E. coli* TOP10 and DH5 $\alpha$   
 508 were grown at 37°C in liquid or solid lysogeny broth (LB), which contained 100  $\mu$ g/ml  
 509 spectinomycin or 50  $\mu$ g/ml kanamycin, when appropriate.

510

## 511 **Construction of strains**

512 Genomic DNA from *N. meningitidis* and *E. coli* strains was prepared using the Wizard  
 513 Genomic DNA Purification kit (Promega) following the manufacturer's instructions.  
 514 Plasmid DNA from *E. coli* strains was purified using the QIAprep Spin Miniprep Kit  
 515 (Qiagen) following the manufacturer's instructions. Bacteria were transformed as  
 516 follows. *N. meningitidis* is naturally competent for transformation. A loopful of bacteria  
 517 grown on GCB plates was resuspended in liquid GC containing 5 mM  $\text{MgCl}_2$  (GC



transfo), 200 µl was aliquoted in the well of a 24-well plate, and DNA was added. After incubation for 30 min at 37°C on an orbital shaker, 0.8 ml GC transfo was added to the wells and the plates were further incubated for 3 h at 37°C, without shaking. Transformants were selected on GCB plates containing suitable antibiotics. For transformation of *E. coli*, ultra-competent cells were prepared as described elsewhere<sup>51</sup> and transformed by a standard heat shock procedure<sup>52</sup>. Transformants were selected on LB plates containing the suitable antibiotic.

The construction of the NeMeSys 2.0 library of meningococcal mutants followed a two-step procedure explained in the Results section (Supplementary Fig. 1). First, we selected a subset of potentially suitable mutants from an archived library of Tn mutants with sequence-defined Tn insertion sites, which was described previously<sup>16,17</sup>. The corresponding genomic DNAs were PCR-verified using primers flanking the Tn insertion sites (Supplementary Table 2). When the mutants were confirmed to be correct, the corresponding mutations were re-transformed in 8013, the mutants were PCR-verified once again and stored at -80°C. The remaining target genes, for which no Tn mutants were available, were then systematically submitted to non-polar targeted mutagenesis using a validated no-cloning method<sup>20</sup>. In brief, using high-fidelity PfuUltra II Fusion HS DNA Polymerase (Agilent) and two sets of specific primers (F1/R1 and F2/R2), we amplified 500-750 bp PCR products upstream and downstream from each target gene, respectively. The R1 and F2 primers were consecutive, non-overlapping and chosen within the target gene (excluding the first and last 30 %) (Supplementary Fig. 1). These primers contained 20-mer overhangs complementary to the F3/R3 primers used to amplify the 1,518 bp kanamycin resistance cassette present in the Tn (Supplementary Table 2), which contains a DNA uptake sequence necessary for efficient transformation in the meningococcus<sup>53</sup> (Supplementary Fig. 1). In the first step, three PCR products were amplified separately using F1/R1, F2/R2 and F3/R3 pairs of primers. The first two PCRs contained a 4-fold excess of outer primers F1 and R2<sup>54</sup>. The three products

were then combined (3.3  $\mu$ l of each) and spliced together by PCR using the excess F1/R2 primers added in the first reaction<sup>54</sup>. The sPCR products were directly transformed into *N. meningitidis*. For each successful transformation, two colonies were isolated and verified by PCR using F1/R2. When transformations yielded no transformants, they were repeated at least three times with different sPCR products. This method was also used to construct several polymutants in which we deleted the 80 kbp RGP\_0, the TA system NMV\_1478/1479, and three repeated prophages (NMV\_1286/1294, NMV\_1387/1398, and NMV\_1412/1418). For each gene that was successfully mutated, one mutant was individually stored at -80°C in glycerol, and the tubes were ordered according to the gene NMV\_ label. Likewise, corresponding genomic DNAs that allow easy re-transformation of these mutations (even in other *Neisseria* strains), were individually ordered in Eppendorf tubes and stored at -20°C. Several mutants, as well as the WT strain, were verified by WGS. Sequencing was performed by MicrobesNG on an Illumina sequencer using standard Nextera protocols. An average of 122 Mb of read sequences (between 80 and 179 Mb) were obtained for each sequencing project, representing an average 53-fold genome coverage. The corresponding Illumina reads have been deposited in the European Nucleotide Archive.

The  $\Delta$ *tsaP*/ $\Delta$ *pilT* and  $\Delta$ NMV\_1205/ $\Delta$ *pilT* double mutants were constructed by transforming  $\Delta$ *tsaP* and  $\Delta$ NMV\_1205 with genomic DNA extracted from a *pilT* mutant disrupted by a cloned *ermAM* cassette conferring resistance to erythromycin<sup>55</sup>.  $\Delta$ NMV\_2228/ $\Delta$ *pilT* could not be constructed because both mutations abolish competence. For complementation assays, complementing genes were amplified using specific indF/indR primers (Supplementary Table 2), with overhangs introducing flanking *PacI* sites for cloning, and a ribosome binding site in front of the gene. The corresponding PCR products were cloned into pCR8/GW/TOPO (Invitrogen), verified by Sanger sequencing and subcloned into pGCC4<sup>56</sup>. This placed the genes under the transcriptional control of an IPTG-inducible promoter, within a

574 DNA an intragenic region of the gonococcal chromosome conserved in *N.*  
 575 *meningitidis*<sup>56</sup>. The resulting plasmids were transformed in the desired  
 576 meningococcal mutant, leading to ectopical insertion of the complementing gene. We  
 577 thus constructed  $\Delta\text{NMV}_{1317}::\text{NMV}_{1317}$ ,  $\Delta\text{NMV}_{1317}::\text{hisB}_{EC}$ ,  
 578  $\Delta\text{NMV}_{1718}::\text{hisB}_{EC}$ ,  $\Delta\text{tsaP}::\text{tsaP}$ ,  $\Delta\text{NMV}_{1205}::\text{NMV}_{1205}$  and  
 579  $\Delta\text{NMV}_{2228}::\text{NMV}_{2228}$ . Since  $\Delta\text{NMV}_{2228}$  is not competent, the last strain was  
 580 constructed by first transforming the corresponding pGCC4 derivative into the WT  
 581 strain, before transforming the  $\Delta\text{NMV}_{2228}$  mutation. Expression of the  
 582 complementing genes in *N. meningitidis* was induced by growing the strains on GCB  
 583 plates containing 0.5 mM IPTG.

584

#### 585 **Dual screen for mutants affected for aggregation and/or twitching motility**

586 *N. meningitidis* mutants grown O/N on GCB plates were resuspended individually  
 587 with a 200  $\mu\text{l}$  pipette tip in the wells of 24-well plates containing 500  $\mu\text{l}$  pre-warmed  
 588 RPMI 1640 with L-glutamine (PAA Laboratories), supplemented with 10 % heat-  
 589 inactivated fetal bovine serum Gold (PAA Laboratories). Plates were incubated for  
 590 approx. 2 h at 37°C. Aggregates forming on the bottom of the wells were visualised  
 591 by phase-contrast microscopy using a Nikon TS100F microscope<sup>38</sup>. Digital images of  
 592 aggregates were recorded using a Sony HDR-CX11 camcorder mounted onto the  
 593 microscope. In parallel, we scored twitching motility by observing whether bacteria in  
 594 aggregates exhibited continuous and vigorous jerky movement<sup>38</sup>. This movement is  
 595 abolished in a  $\Delta\text{pilT}$  mutant, in which the T4P retraction motor that powers twitching  
 596 motility is not produced anymore.

597

#### 598 **Detection and quantification of T4P**

599 Pilus purification by ammonium sulfate precipitation was carried out as follows.  
 600 Bacteria grown O/N on GCB plates were first resuspended in 1.5 ml ethanolamine  
 601 buffer (150 mM ethanolamine, 65 mM NaCl) at pH 10.5. Filaments were sheared by

602 vortexing at maximum speed for 1 min, before OD<sub>600</sub> was adjusted to 9-12 using  
603 ethanolamine buffer (in 1.5 ml final volume). Bacteria were then pelleted by  
604 centrifugation at 17,000 g at 4°C during 10 min. The supernatant (1.35 ml) was  
605 recovered, topped to 1.5 ml with ethanolamine buffer. This step was repeated once,  
606 and filaments were precipitated for approx. 1 h at room temperature (RT) by adding  
607 150 µl ethanolamine buffer saturated with ammonium sulphate. Filaments were then  
608 pelleted by centrifugation at 17,000 g at 4°C during 15 min. Pellets were rinsed once  
609 with 100 µl Tris-buffered saline at pH 8, and finally resuspended in 100 µl of Laemmli  
610 buffer (BioRad) containing β-mercaptoethanol.

611 Piliation was quantified by performing whole-cell ELISA<sup>38</sup> using the 20D9  
612 mouse monoclonal antibody that is specific for the T4P in strain 8013<sup>57</sup>. Bacteria  
613 grown O/N on GCB plates were resuspended in PBS, adjusted to OD<sub>600</sub> 0.1 and  
614 heat-killed during 1 h at 56°C. Serial 2-fold dilutions were then aliquoted (100 µl) in  
615 the wells of 96-well plates. Each well was made in triplicate. The plates were dried  
616 O/N at RT in a running safety cabinet. The next day, wells were washed seven times  
617 with washing solution (0.1 % Tween 80 in PBS), before adding 100 µl/well of 20D9  
618 antibody (diluted 1/1,000 in washing solution containing 5 % skimmed milk). Plates  
619 were incubated 1 h at RT, and then washed seven times with washing solution. Next,  
620 we added 100 µl/well of Amersham ECL-HRP linked mouse IgG antibody (GE  
621 Healthcare) diluted 1/10,000. Plates were incubated 1 h at RT, and then washed  
622 seven times with washing solution. We then added 100 µl/well of TMB solution  
623 (Thermo Scientific) and incubated the plates during 20 min at RT in the dark. Finally,  
624 we stopped the reaction by adding 100 µl/well of 0.18 M sulfuric acid, before reading  
625 the plates at 450 nm using a plate reader. Statistical analyses were performed with  
626 Prism (GraphPad Software) using appropriate tests as described in the legends to  
627 figures.

628

## 629 **SDS-PAGE, Coomassie staining and immunoblotting**

Purified T4P were separated by SDS-PAGE using 15 % polyacrylamide gels. Gels were stained using Bio-Safe Coomassie stain (BioRad) or blotted to Amersham Hybond ECL membranes (GE Healthcare) using standard molecular biology techniques<sup>52</sup>. Blocking, incubation with primary/secondary antibodies and detection using Amersham ECL Plus reagents (GE Healthcare) were done following the manufacturer's instructions. The primary antibody was a previously described rabbit anti-PilE serum (1/2,500)<sup>58</sup>, while the secondary antibody (1/10,000) was a commercial Amersham ECL-HRP linked rabbit IgG (GE Healthcare).

638

### 639 **Quantifying transformation in the meningococcus**

Since the tested mutants are Km<sup>R</sup>, we tested their competence by transforming them to Rif<sup>R</sup> using DNA from a mutant of 8013 spontaneously resistant to rifampicin<sup>59</sup>. We first amplified by PCR, using *rpoF*/*rpoR* primers, a 1,172 bp internal portion of *rpoB*, which usually contains point mutations<sup>60</sup> leading to Rif<sup>R</sup>. This PCR product was cloned in pCR8/GW/TOPO and sequenced, which revealed a single point mutation, leading to a His → Tyr substitution at position 553 in RpoB. This pCR8/GW/TOPO derivative was used to amplify the PCR product used for quantifying competence, which was done as follows. Bacteria grown O/N on GCB plates were resuspended in pre-warmed liquid GC transfo at an OD<sub>600</sub> of 0.1. The number of bacterial cells in this suspension was quantified by performing colony-forming unit (CFU) counts. We mixed 200 µl of bacterial suspension with 100 ng of transforming DNA in the wells of a 24-well plate. After incubating for 30 min at 37°C on an orbital shaker, 0.8 ml GC transfo was added to the wells and the plates were further incubated during 3 h at 37°C without shaking. Transformants were selected by plating appropriate dilutions on plates containing rifampicin and by counting, the next day, the number of Rif<sup>R</sup> CFU. Transformation frequencies are expressed as % of transformed recipient cells.

656

### 657 **Bioinformatics**

658 The Qiagen CLC Genomics Workbench software was used for WGS analysis. In  
659 brief, Illumina reads from each strain were mapped onto the published sequence of  
660 8013<sup>16</sup>, and good quality and high frequency (>70 %) base changes and small  
661 deletions/insertions were identified. Large deletions/insertions were identified using  
662 annotated assemblies (N50 between 38,959 and 45,097 bp), which were visualised  
663 in Artemis<sup>61</sup>, by performing pairwise sequence alignments using DNA Strider<sup>62</sup>.

664 The genome of strain 8013 and a total of 108 complete genomes from NCBI  
665 RefSeq (last accessed June 8<sup>th</sup>, 2020) (Supplementary Table 5) were used to  
666 compute the *N. meningitidis* pangenome using the PPanGGOLiN software<sup>21</sup> (version  
667 1.1.85). The original annotations of the genomes have been kept in order to compute  
668 gene families. In brief, PPanGGOLiN uses a statistical model to infer the pangenome  
669 classes (persistent, shell and cloud) based on both the presence/absence of gene  
670 families and genomic neighbourhood information<sup>21</sup>. The options "--use pseudo" and  
671 "--defrag" were used to consider pseudogenes in the gene family computation, and to  
672 associate fragmented genes with their original gene family, respectively. The other  
673 parameters have been used with default values to compute the persistent, shell and  
674 cloud partitions. The PPanGGOLiN results were then used to predict regions of  
675 genomic plasticity using the panRGP method with default options<sup>30</sup>.

676 Datasets and annotations generated during this study have been stored within  
677 MicroScope<sup>23</sup>. This publicly accessible web interface can be used to visualise  
678 genomes (simultaneously with synteny maps in other microbial genomes), perform  
679 queries (by BLAST or keyword searches) and download datasets/annotations in a  
680 variety of formats (including EMBL and GenBank).

681 **Data availability**

682 Whole genome sequencing data that support the findings in this study have been  
 683 deposited in the European Nucleotide Archive under accession number  
 684 [PRJEB39197](https://www.ebi.ac.uk/ena/record/PRJEB39197). All the datasets generated during this study are either included in this  
 685 published article (and its Supplementary Information files), or available in MicroScope  
 686 ([http://mage.genoscope.cns.fr/microscope/mage/viewer.php?O\\_id=99](http://mage.genoscope.cns.fr/microscope/mage/viewer.php?O_id=99)).

# References

1. Jolley, K.A. & Maiden, M.C. BIGSdb: Scalable analysis of bacterial genome variation at the population level. *BMC Bioinfo.* **11**, 595 (2010).
2. Ghatak, S., King, Z.A., Sastry, A. & Palsson, B.O. The y-ome defines the 35% of *Escherichia coli* genes that lack experimental evidence of function. *Nucleic Acids Res.* **47**, 2446-2454 (2019).
3. Galperin, M.Y. & Koonin, E.V. From complete genome sequence to 'complete' understanding? *Trends Biotechnol.* **28**, 398-406 (2010).
4. Akerley, B.J. *et al.* A genome-scale analysis for identification of genes required for growth or survival of *Haemophilus influenzae*. *Proc. Natl. Acad. Sci. USA* **99**, 966-971 (2002).
5. Liberati, N.T. *et al.* An ordered, nonredundant library of *Pseudomonas aeruginosa* strain PA14 transposon insertion mutants. *Proc. Natl. Acad. Sci. USA* **103**, 2833-2838 (2006).
6. Deutschbauer, A. *et al.* Evidence-based annotation of gene function in *Shewanella oneidensis* MR-1 using genome-wide fitness profiling across 121 conditions. *PLoS Genet.* **7**, e1002385 (2011).
7. van Opijnen, T., Lazinski, D.W. & Camilli, A. Genome-wide fitness and genetic interactions determined by Tn-seq, a high-throughput massively parallel sequencing method for microorganisms. *Curr. Protoc. Mol. Biol.* **106**, 7.16.1-7.16.24 (2014).
8. Langridge, G.C. *et al.* Simultaneous assay of every *Salmonella* Typhi gene using one million transposon mutants. *Genome Res.* **19**, 2308-2316 (2009).
9. Christen, B. *et al.* The essential genome of a bacterium. *Mol. Syst. Biol.* **7**, 528 (2011).
10. Baba, T. *et al.* Construction of *Escherichia coli* K-12 in-frame, single-gene knockout mutants: the Keio collection. *Mol. Syst. Biol.* **2**, 2006.0008 (2006).



- 714 11. Kobayashi, K. *et al.* Essential *Bacillus subtilis* genes. *Proc. Natl. Acad. Sci. USA*  
715 **100**, 4678-4683 (2003).
- 716 12. de Berardinis, V. *et al.* A complete collection of single-gene deletion mutants of  
717 *Acinetobacter baylyi* ADP1. *Mol. Syst. Biol.* **4**, 174 (2008).
- 718 13. Xu, P. *et al.* Genome-wide essential gene identification in *Streptococcus*  
719 *sanguinis*. *Sci. Rep.* **1**, 125 (2011).
- 720 14. Nichols, R.J. *et al.* Phenotypic landscape of a bacterial cell. *Cell* **144**, 143-156  
721 (2011).
- 722 15. Mushegian, A.R. & Koonin, E.V. A minimal gene set for cellular life derived by  
723 comparison of complete bacterial genomes. *Proc. Natl. Acad. Sci. USA* **93**, 10268-  
724 10273 (1996).
- 725 16. Rusniok, C. *et al.* NeMeSys: a resource for narrowing the gap between sequence  
726 and function in the human pathogen *Neisseria meningitidis*. *Genome Biol.* **10**,  
727 R110 (2009).
- 728 17. Geoffroy, M., Floquet, S., Métais, A., Nassif, X. & Pelicic, V. Large-scale analysis  
729 of the meningococcus genome by gene disruption: resistance to complement-  
730 mediated lysis. *Genome Res.* **13**, 391-398 (2003).
- 731 18. Heidrich, N. *et al.* The primary transcriptome of *Neisseria meningitidis* and its  
732 interaction with the RNA chaperone Hfq. *Nucleic Acids Res.* **45**, 6147-6167  
733 (2017).
- 734 19. Martin, P. *et al.* Experimentally revised repertoire of putative contingency loci in  
735 *Neisseria meningitidis* strain MC58: evidence for a novel mechanism of phase  
736 variation. *Mol. Microbiol.* **50**, 245-257 (2003).
- 737 20. Georgiadou, M., Castagnini, M., Karimova, G., Ladant, D. & Pelicic, V. Large-  
738 scale study of the interactions between proteins involved in type IV pilus biology in  
739 *Neisseria meningitidis*: characterization of a subcomplex involved in pilus  
740 assembly. *Mol. Microbiol.* **84**, 857-873 (2012).

- 741 21. Gautreau, G. *et al.* PPanGGOLiN: Depicting microbial diversity via a partitioned  
742 pangenome graph. *PLoS Comput. Biol.* **16**, e1007732 (2020).
- 743 22. Hutchison, C.A. *et al.* Design and synthesis of a minimal bacterial genome.  
744 *Science* **351**, aad6253 (2016).
- 745 23. Vallenet, D. *et al.* MicroScope: an integrated platform for the annotation and  
746 exploration of microbial gene functions through genomic, pangenomic and  
747 metabolic comparative analysis. *Nucleic Acids Res.* **48**, D579-D589 (2020).
- 748 24. Serres, M.H. & Riley, M. MultiFun, a multifunctional classification scheme for  
749 *Escherichia coli* K-12 gene products. *Microb. Comp. Genomics* **5**, 205-222 (2000).
- 750 25. Caspi, R. *et al.* The MetaCyc database of metabolic pathways and enzymes - a  
751 2019 update. *Nucleic Acids Res.* **48**, D445-D453 (2020).
- 752 26. Huerta-Cepas, J. *et al.* eggNOG 5.0: a hierarchical, functionally and  
753 phylogenetically annotated orthology resource based on 5090 organisms and  
754 2502 viruses. *Nucleic Acids Res.* **47**, D309-D314 (2019).
- 755 27. Galperin, M.Y., Makarova, K.S., Wolf, Y.I. & Koonin, E.V. Expanded microbial  
756 genome coverage and improved protein family annotation in the COG database.  
757 *Nucleic Acids Res.* **43**, D261-D269 (2015).
- 758 28. Meyer, F., Overbeek, R. & Rodriguez, A. FIGfams: yet another set of protein  
759 families. *Nucleic Acids Res.* **37**, 6643-6654 (2009).
- 760 29. Jones, P. *et al.* InterProScan 5: genome-scale protein function classification.  
761 *Bioinformatics* **30**, 1236-1240 (2014).
- 762 30. Bazin, A., Gautreau, G., Médigue, C., Vallenet, D. & Calteau, A. panRGP: a  
763 pangenome-based method to predict genomic islands and explore their diversity.  
764 Preprint at <http://www.biorxiv.org/content/10.1101/2020.03.26.007484v1> (2020).
- 765 31. Yamaguchi, Y., Park, J.H. & Inouye, M. Toxin-antitoxin systems in bacteria and  
766 archaea. *Annu. Rev. Genet.* **45**, 61-79 (2011).

- 767 32. van Ulsen, P., Rutten, L., Feller, M., Tommassen, J. & van der Ende, A. Two-  
768 partner secretion systems of *Neisseria meningitidis* associated with invasive clonal  
769 complexes. *Infect. Immun.* **76**, 4649-4658 (2008).
- 770 33. Jamet, A. *et al.* A new family of secreted toxins in pathogenic *Neisseria* species.  
771 *PLoS Pathog.* **11**, e1004592 (2015).
- 772 34. Kulis-Horn, R.K., Ruckert, C., Kalinowski, J. & Persicke, M. Sequence-based  
773 identification of inositol monophosphatase-like histidinol-phosphate phosphatases  
774 (HisN) in *Corynebacterium glutamicum*, Actinobacteria, and beyond. *BMC*  
775 *Microbiol.* **17**, 161 (2017).
- 776 35. Price, M.N. *et al.* Mutant phenotypes for thousands of bacterial genes of unknown  
777 function. *Nature* **557**, 503-509(2018).
- 778 36. Pelicic, V. Type IV pili: *e pluribus unum*? *Mol. Microbiol.* **68**, 827-837 (2008).
- 779 37. Berry, J.L. & Pelicic, V. Exceptionally widespread nano-machines composed of  
780 type IV pilins: the prokaryotic Swiss Army knives. *FEMS Microbiol. Rev.* **39**, 134-  
781 154 (2015).
- 782 38. Brown, D., Helaine, S., Carbonnelle, E. & Pelicic, V. Systematic functional  
783 analysis reveals that a set of 7 genes is involved in fine tuning of the multiple  
784 functions mediated by type IV pili in *Neisseria meningitidis*. *Infect. Immun.* **78**,  
785 3053-3063 (2010).
- 786 39. Carbonnelle, E., Helaine, S., Prouvensier, L., Nassif, X. & Pelicic, V. Type IV  
787 pilus biogenesis in *Neisseria meningitidis*: PilW is involved in a step occurring after  
788 pilus assembly, essential for fiber stability and function. *Mol. Microbiol.* **55**, 54-64  
789 (2005).
- 790 40. Helaine, S. *et al.* PilX, a pilus-associated protein essential for bacterial  
791 aggregation, is a key to pilus-facilitated attachment of *Neisseria meningitidis* to  
792 human cells. *Mol. Microbiol.* **55**, 65-77 (2005).
- 793 41. Merz, A.J., So, M. & Sheetz, M.P. Pilus retraction powers bacterial twitching  
794 motility. *Nature* **407**, 98-102 (2000).

- 795 42. Siewering, K. *et al.* Peptidoglycan-binding protein TsaP functions in surface  
796 assembly of type IV pili. *Proc. Natl. Acad. Sci. USA* **111**, E953-E961 (2014).
- 797 43. Koo, J., Lamers, R.P., Rubinstein, J.L., Burrows, L.L. & Howell, P.L. Structure of  
798 the *Pseudomonas aeruginosa* type IVa pilus secretin at 7.4 Å. *Structure* **24**, 1778-  
799 1787 (2016).
- 800 44. Smith, K.S. & Ferry, J.G. Prokaryotic carbonic anhydrases. *FEMS Microbiol. Rev.*  
801 **24**, 335-366 (2000).
- 802 45. Carbonnelle, E., Helaine, S., Nassif, X. & Pelicic, V. A systematic genetic  
803 analysis in *Neisseria meningitidis* defines the Pil proteins required for assembly,  
804 functionality, stabilization and export of type IV pili. *Mol. Microbiol.* **61**, 1510-1522  
805 (2006).
- 806 46. Berry, J.L., Cehovin, A., McDowell, M.A., Lea, S.M. & Pelicic, V. Functional  
807 analysis of the interdependence between DNA uptake sequence and its cognate  
808 ComP receptor during natural transformation in *Neisseria* species. *PLoS Genet.* **9**,  
809 e1004014 (2013).
- 810 47. Denise, R., Abby, S.S. & Rocha, E.P.C. Diversification of the type IV filament  
811 superfamily into machines for adhesion, protein secretion, DNA uptake, and  
812 motility. *PLoS Biol.* **17**, e3000390 (2019).
- 813 48. Baart, G.J. *et al.* Modeling *Neisseria meningitidis* metabolism: from genome to  
814 metabolic fluxes. *Genome Biol.* **8**, R136 (2007).
- 815 49. Mendum, T.A., Newcombe, J., Mannan, A.A., Kierzek, A.M. & McFadden, J.  
816 Interrogation of global mutagenesis data with a genome scale model of *Neisseria*  
817 *meningitidis* to assess gene fitness *in vitro* and in sera. *Genome Biol.* **12**, R127  
818 (2011).
- 819 50. Nassif, X. *et al.* Antigenic variation of pilin regulates adhesion of *Neisseria*  
820 *meningitidis* to human epithelial cells. *Mol. Microbiol.* **8**, 719-725 (1993).
- 821 51. Inoue, H., Nojima, H. & Okayama, H. High efficiency transformation of  
822 *Escherichia coli* with plasmids. *Gene* **96**, 23-28 (1990).

- 823 52. Sambrook, J. & Russell, D.W. *Molecular cloning. A laboratory manual*, (Cold  
824 Spring Harbor Laboratory Press, Cold Spring Harbor, New York, 2001).
- 825 53. Pelicic, V., Morelle, S., Lampe, D. & Nassif, X. Mutagenesis of *Neisseria*  
826 *meningitidis* by *in vitro* transposition of *Himar1* mariner. *J. Bacteriol.* **182**, 5391-  
827 5398 (2000).
- 828 54. Metzgar, D. *et al.* *Acinetobacter* sp. ADP1: an ideal model organism for genetic  
829 analysis and genome engineering. *Nucleic Acids Res.* **32**, 5780-5790 (2004).
- 830 55. Pujol, C., Eugène, E., Marceau, M. & Nassif, X. The meningococcal PilT protein  
831 is required for induction of intimate attachment to epithelial cells following pilus-  
832 mediated adhesion. *Proc. Natl. Acad. Sci. USA* **96**, 4017-4022 (1999).
- 833 56. Mehr, I.J., Long, C.D., Serkin, C.D. & Seifert, H.S. A homologue of the  
834 recombination-dependent growth gene, *rdgC*, is involved in gonococcal pilin  
835 antigenic variation. *Genetics* **154**, 523-532 (2000).
- 836 57. Pujol, C., Eugène, E., de Saint Martin, L. & Nassif, X. Interaction of *Neisseria*  
837 *meningitidis* with a polarized monolayer of epithelial cells. *Infect. Immun.* **65**, 4836-  
838 4842 (1997).
- 839 58. Morand, P.C. *et al.* Type IV pilus retraction in pathogenic *Neisseria* is regulated  
840 by the PilC proteins. *EMBO J.* **23**, 2009-2017 (2004).
- 841 59. Cehovin, A. *et al.* Specific DNA recognition mediated by a type IV pilin. *Proc.*  
842 *Natl. Acad. Sci. USA* **110**, 3065-3070 (2013).
- 843 60. Carter, P.E., Abadi, F.J., Yakubu, D.E. & Pennington, T.H. Molecular  
844 characterization of rifampin-resistant *Neisseria meningitidis*. *Antimicrob. Agents*  
845 *Chemother.* **38**, 1256-1261 (1994).
- 846 61. Carver, T., Harris, S.R., Berriman, M., Parkhill, J. & McQuillan, J.A. Artemis: an  
847 integrated platform for visualization and analysis of high-throughput sequence-  
848 based experimental data. *Bioinformatics* **28**, 464-469 (2012).

- 849 62. Marck, C. 'DNA Strider': a 'C' program for the fast analysis of DNA and protein  
850 sequences on the Apple Macintosh family of computers. *Nucleic Acids Res.* **16**,  
851 1829-1836 (1988).
- 852 63. Luo, H., Lin, Y., Gao, F., Zhang, C.T. & Zhang, R. DEG 10, an update of the  
853 database of essential genes that includes both protein-coding genes and  
854 noncoding genomic elements. *Nucleic Acids Res.* **42**, D574-D580 (2014).

## 855 **Acknowledgements**

856 This work was supported by funding from the Wellcome Trust (092290/Z/10/Z) to VP.  
 857 The France Génomique and French Bioinformatics Institute national infrastructures –  
 858 funded as part of Investissement d'Avenir program managed by the Agence  
 859 Nationale pour la Recherche (contracts ANR-10-INBS-09 and ANR-11-INBS-0013) –  
 860 are acknowledged for support of the MicroScope annotation platform. We thank  
 861 Angelika Gründling (Imperial College London) and Christoph Tang (University of  
 862 Oxford) for critical reading of the manuscript.

863 **Author contributions**

864 V. P. was responsible for conception and supervision of the work, interpretation of  
865 data, and writing of manuscript. A. M., I. G., A. C. and V. P performed the  
866 experimental studies. A. B. and D. V. performed the computational studies.



867     **Competing interests**

868     The authors declare no competing interests.

869 **Table 1. Essential meningococcal genes listed by functional category/sub-**  
870 **category.** For this classification, we used predictions from MultiFun<sup>24</sup>, MetaCyc<sup>25</sup>,  
871 eggNOG<sup>26</sup>, COG<sup>27</sup>, FIGfam<sup>28</sup>, and/or InterProScan<sup>29</sup>. The corresponding datasets are  
872 listed in Supplementary Table 8.

873

| Functional category/sub-category        | Number of genes | % of total  |
|-----------------------------------------|-----------------|-------------|
| <b>gene/protein expression</b>          | <b>150</b>      | <b>38.4</b> |
| ribosomal protein                       | 51              | 13          |
| aminoacyl-tRNA synthesis                | 24              | 6.1         |
| protein export                          | 21              | 5.4         |
| RNA modification/degradation            | 19              | 4.9         |
| DNA transcription                       | 11              | 2.8         |
| translation factors                     | 10              | 2.6         |
| protein folding                         | 7               | 1.8         |
| ribosome biogenesis/maturation          | 5               | 1.3         |
| protein post-translational modification | 2               | 0.5         |
| <b>genome/cell replication</b>          | <b>33</b>       | <b>8.4</b>  |
| chromosome replication/maintenance      | 20              | 5.1         |
| cell division                           | 13              | 3.3         |
| <b>cell membrane/wall biogenesis</b>    | <b>54</b>       | <b>13.8</b> |
| peptidoglycan biosynthesis/recycling    | 17              | 4.3         |
| LOS biosynthesis                        | 14              | 3.6         |
| fatty acid biosynthesis                 | 12              | 3.1         |
| phospholipids biosynthesis              | 8               | 2           |
| UDP-GlcNAc biosynthesis                 | 3               | 0.8         |
| <b>cytosolic metabolism</b>             | <b>120</b>      | <b>30.7</b> |
| vitamins biosynthesis                   | 24              | 6.1         |
| nucleotide biosynthesis                 | 15              | 3.8         |
| aerobic respiration/cytochrome c        | 12              | 3.1         |
| amino acid metabolism                   | 9               | 2.3         |
| isoprenoid biosynthesis                 | 9               | 2.3         |
| electron transport                      | 9               | 2.3         |
| heme biosynthesis                       | 9               | 2.3         |
| sugar metabolism                        | 9               | 2.3         |
| Fe-S cluster biosynthesis               | 6               | 1.5         |
| CoA/ac-CoA biosynthesis                 | 6               | 1.5         |
| ubiquinol biosynthesis                  | 4               | 1           |
| NAD/NADP biosynthesis                   | 3               | 0.8         |
| lipoate biosynthesis                    | 2               | 0.5         |
| SAM biosynthesis                        | 1               | 0.3         |
| phosphate metabolism                    | 1               | 0.3         |
| sulfur metabolism                       | 1               | 0.3         |
| <b>unassigned</b>                       | <b>34</b>       | <b>8.7</b>  |
| <b>Total</b>                            | <b>391</b>      | <b>100</b>  |

874

875 **Table 2. Mutants in the complete NeMeSys 2.0 library of meningococcal**  
876 **mutants affected for two functions mediated by T4P: aggregation and twitching**  
877 **motility.** The other 1,569 mutants can form aggregates and exhibit twitching motility.  
878 N/A, not assayable because we could assess twitching motility only in mutants  
879 forming aggregates. The corresponding datasets are listed in Supplementary Table  
880 10.

881

| Mutated gene                                                                              | Product                                     | Aggregation   | Twitching |
|-------------------------------------------------------------------------------------------|---------------------------------------------|---------------|-----------|
| <b>Genes previously known to be involved in T4P biology in <i>N. meningitidis</i></b>     |                                             |               |           |
| <i>pilE</i>                                                                               | major pilin PilE                            | -             | N/A       |
| <i>pilT</i>                                                                               | type IV pilus retraction ATPase PilT        | + (irregular) | -         |
| <i>pilF</i>                                                                               | type IV pilus extension ATPase PilF         | -             | N/A       |
| <i>pilD</i>                                                                               | leader peptidase / N-methyltransferase PilD | -             | N/A       |
| <i>pilG</i>                                                                               | type IV pilus biogenesis protein PilG       | -             | N/A       |
| <i>pilW</i>                                                                               | type IV pilus biogenesis lipoprotein PilW   | -             | N/A       |
| <i>pilX</i>                                                                               | minor pilin PilX                            | -             | N/A       |
| <i>pilK</i>                                                                               | type IV pilus biogenesis protein PilK       | -             | N/A       |
| <i>pilJ</i>                                                                               | type IV pilus biogenesis protein PilJ       | -             | N/A       |
| <i>pilI</i>                                                                               | type IV pilus biogenesis protein PilI       | -             | N/A       |
| <i>pilH</i>                                                                               | type IV pilus biogenesis protein PilH       | -             | N/A       |
| <i>pilZ</i>                                                                               | PilZ protein                                | -             | N/A       |
| <i>pilM</i>                                                                               | type IV pilus biogenesis protein PilM       | -             | N/A       |
| <i>pilN</i>                                                                               | type IV pilus biogenesis protein PilN       | -             | N/A       |
| <i>pilO</i>                                                                               | type IV pilus biogenesis protein PilO       | -             | N/A       |
| <i>pilP</i>                                                                               | type IV pilus biogenesis lipoprotein PilP   | -             | N/A       |
| <i>pilQ</i>                                                                               | type IV pilus secretin PilQ                 | -             | N/A       |
| <b>Genes not previously known to be involved in T4P biology in <i>N. meningitidis</i></b> |                                             |               |           |
| <i>tsaP</i>                                                                               | secretin-associated protein TsaP            | -             | N/A       |
| NMV_1205                                                                                  | conserved hypothetical periplasmic protein  | -             | N/A       |
| NMV_2228                                                                                  | putative carbonic anhydrase                 | +/-           | N/A       |

882

## 883    **Legends to Figures**

884

### 885    **Fig. 1. Flowchart of the construction of the NeMeSys 2.0 complete collection of**

886    **mutants in *N. meningitidis* 8013.** As for similar efforts in other bacteria<sup>10,12,13</sup>, we

887    first selected protein-coding genes to be targeted by systematic mutagenesis,

888    excluding 85 genes (4.1 %) because they encode transposases of repeated insertion

889    sequences, or correspond to short remnants of truncated genes or cassettes

890    (Supplementary Table 1). We then followed a two-step mutagenesis approach

891    explained in the text and in Supplementary Fig. 1. In brief, we first selected a subset

892    of sequence-verified Tn mutants from a previously constructed arrayed library<sup>16,17</sup>.

893    Mutations were re-transformed in strain 8013 and PCR-verified. We thus selected

894    801 Tn mutants with a disrupting transposon in the corresponding target genes. Next,

895    we systematically mutagenised the remaining 1,174 target genes using a validated

896    no-cloning mutagenesis method relying on sPCR<sup>20</sup>. For each successful

897    transformation, two colonies were isolated and PCR-verified. To minimise false

898    positive identification of essential genes, each transformation that yielded no

899    transformants was repeated at least three times. In total, we could construct an

900    additional 783 mutants, generating an ordered library of defined mutants in 1,584

901    meningococcal genes (Supplementary Table 3). This effort also identified 391

902    candidate essential genes, which could not be disrupted, encoding proteins required

903    for *N. meningitidis* growth on rich medium (Supplementary Table 4).

904

### 905    **Fig. 2. Partition of essential meningococcal genes into persistent, shell, and**

906    **cloud genomes.** To perform this analysis, we used the PPanGGOLiN<sup>21</sup> method as

907    explained in the text. **a)** Partition of the 2,060 genes in the genome of *N. meningitidis*

908    8013. The corresponding datasets are listed in Supplementary Table 5. **b)** Partition of

909    the subset of 391 essential genes identified in this study. The corresponding datasets

910    are listed in Supplementary Table 5.

911

912 **Fig. 3. Comparison of *N. meningitidis* essential genome to that of other**

913 **bacteria.** a) Edwards-Venn diagram displaying overlaps between essential genes in  
914 bacteria in which complete libraries of mutants have been constructed: *N.*  
915 *meningitidis* (black line), *E. coli* (green line)<sup>10</sup>, *A. baylyi* (red line)<sup>12</sup> and *S. sanguinis*  
916 (blue line)<sup>13</sup>. To perform this analysis, we queried the DEG database<sup>63</sup> of essential  
917 genes using our set of essential genes. The corresponding datasets are listed in  
918 Supplementary Table 6. **b)** Comparison of *N. meningitidis* essential genome (black  
919 line) to JCVI-syn3.0 (red line), a synthetic *M. mycoides* designed with a minimal  
920 genome<sup>22</sup>. The corresponding datasets are listed in Supplementary Table 7.

921

922 **Fig. 4. Partition of the meningococcal essential genes into four major**

923 **functional groups.** Gene/protein expression (38.4 %, orange), genome/cell  
924 replication (8.4 %, green), cell membrane/wall biogenesis (13.8 %, blue), and  
925 cytosolic metabolism (30.7 %, yellow). Only 34 essential genes (8.3 %) could not be  
926 clearly assigned to one of these four categories. The corresponding datasets are  
927 listed in Supplementary Table 8.

928

929 **Fig. 5. Concise cellular overview of the essential meningococcal genome.**

930 Essential genes were integrated into networks and metabolic pathways using  
931 primarily MetaCyc<sup>25</sup>. The four basic functional groups are highlighted using the same  
932 colour as in Fig. 4, *i.e.* orange (gene/protein expression), green (genome/cell  
933 replication), blue (cell membrane/wall biogenesis), and yellow (cytosolic metabolism).  
934 The 34 essential genes that could not be clearly assigned to one of these four  
935 categories are not represented on the figure. Genes involved in the different  
936 reactions are indicated by their name or NMV\_ label, in red when essential, in black  
937 when dispensable. \*Genes involved in more than one pathway. Key  
938 compounds/proteins are abbreviated as follows. ACP, acyl carrier protein; AIR,

939 aminoimidazole ribotide; CDP-DAG, CDP-diacylglycerol; CMP-Kdo, CMP-  
 940 ketodeoxyoctonate; DHAP, dihydroxyacetone phosphate; DPP, dimethylallyl  
 941 diphosphate; DXP, 1-deoxyxylulose-5P; Fe-S, iron-sulfur; FMN, flavin  
 942 mononucleotide; G3P, glyceraldehyde-3P Glu-6P, glucose-6P; IMP, inosine  
 943 monophosphate; IPP, isopentenyl diphosphate; LOS, lipo-oligosaccharide; M-DAP,  
 944 *meso*-diaminopimelate; NaMN, nicotinate D-ribonucleotide; OPP, all-*trans*-octaprenyl  
 945 diphosphate; PE, phosphatidylethanolamine; PG, phosphatidylglycerol; PHBA, *p*-  
 946 hydroxybenzoate; PRPP, 5-phosphoribosyl diphosphate; Rib-5P, ribulose-5P; SAM,  
 947 S-adenosyl-methionine; UDP-GlcNAc, UDP-*N*-acetyl-glucosamine; UP, di-*trans*-poly-  
 948 *cis*-undecaprenyl monophosphate; UPP, di-*trans*-poly-*cis*-undecaprenyl diphosphate.  
 949 The corresponding datasets are listed in Supplementary Table 8.

950

951 **Fig. 6. Essential genes in RGP – NMV\_1479 and NMV-0559 – are conditionally**  
 952 **essential. a)** Gene organisation of the putative antitoxin NMV\_1478 (highlighted in  
 953 red) with its neighbouring NMV\_1479 toxin. Results of the mutagenesis (☞) are  
 954 shown. ☹, viable mutant; ☠, lethal phenotype. **b)** Gene organisation of the *tps*  
 955 RGP (RGP\_0) to which NMV\_0559 (highlighted in red) belongs (Supplementary  
 956 Table 9). Genes on the + strand are in white, genes on the - strand are in black.  
 957 Results of the mutagenesis (☞) are shown. ☹, viable mutant; ☠, lethal phenotype.  
 958 In contrast to NMV\_0559, each of the other target genes in the *tps* RGP could be  
 959 mutated individually (not shown for readability).

960

961 **Fig. 7. NMV\_1317 encodes a novel histidinol-phosphatase. a)** Histidine  
 962 biosynthesis pathway in the meningococcus. PRPP, 5-phosphoribosyl diphosphate;  
 963 PRFAR, phosphoribulosylformimino-AICAR-P; IGP, erythro-imidazole-glycerol-P. **b)**  
 964 Growth on M9 minimal medium, with or without added histidine (His). The plates also  
 965 contained 0.5 mM IPTG for inducing expression of the complementing genes. WT,

strain 8013;  $\Delta 1317$ ,  $\Delta NMV\_1317$  mutant;  $\Delta 1317::1317$ ,  $\Delta NMV\_1317$  complemented with  $NMV\_1317$ ;  $\Delta 1317::hisB_{EC}$ ,  $\Delta NMV\_1317$  cross-complemented with  $hisB_{EC}$  from *E. coli*, which encodes the unrelated histidinol-phosphatase present in this species;  $\Delta 1718$ ,  $\Delta NMV\_1718$  mutant;  $\Delta 1718::hisB_{EC}$ , control showing that  $\Delta NMV\_1718$  (*hisH*) cannot be cross-complemented by  $hisB_{EC}$ .

**Fig. 8. Assaying piliation in the mutants in genes not previously associated with T4P biology in *N. meningitidis*.** The WT strain and a non-piliated  $\Delta pilD$  mutant were included as positive and negative controls, respectively.  $\Delta tsaP$ ,  $\Delta tsaP$  mutant;  $\Delta 1205$ ,  $\Delta NMV\_1205$  mutant;  $\Delta 2228$ ,  $\Delta NMV\_2228$  mutant. **a)** T4P purified using a shearing/precipitation method were separated by SDS-PAGE and either stained with Coomassie blue (upper panel) or analysed by immunoblotting using an antibody against the major pilin PilE (lower panel)<sup>58</sup>. Samples were prepared from equivalent numbers of cells and identical volumes were loaded in each lane. MW, molecular weight marker lane, with values in kDa. **b)** T4P were quantified by whole-cell ELISA using a monoclonal antibody specific for the filaments of strain 8013<sup>57</sup>. Equivalent numbers of cells, based on OD<sub>600</sub> readings, were applied to the wells of microtiter plates. Results are expressed in % piliation (ratio to WT) and are the average  $\pm$  standard deviations from five independent experiments. For statistical analysis, one-way ANOVAs followed by Dunnett's multiple comparison tests were performed (\*\*\*  $p < 0.0001$ ).

**Fig 9. Functional analysis of the mutants in genes not previously associated with T4P biology in *N. meningitidis*.** The WT strain and a non-piliated  $pilD$  mutant were included as positive and negative controls, respectively. **a)** Aggregation in liquid culture as assessed by phase-contrast microscopy<sup>38</sup>.  $\Delta tsaP::tsaP$ ,  $\Delta tsaP$  complemented with  $tsaP$ ;  $\Delta tsaP/\Delta pilT$ , double mutant in  $tsaP$  and  $pilT$ ;  $\Delta 1025::1205$ ,  $\Delta NMV\_1205$  complemented with  $NMV\_1205$ ;  $\Delta 1205/\Delta pilT$ , double mutant in

994 NMV\_1205 and *pilT*;  $\Delta 2228::2228$ ,  $\Delta$ NMV\_2228 complemented with NMV\_2228. **b)**  
 995 Quantification of the competence for DNA transformation. Equivalent numbers of  
 996 recipient cells were transformed using a *rpoB* PCR product containing a point  
 997 mutation leading to rifampicin resistance. Results are expressed as transformation  
 998 frequencies and are the average  $\pm$  standard deviations from four independent  
 999 experiments. For statistical analysis, one-way ANOVAs followed by Dunnett's  
 1000 multiple comparison tests were performed (\*\* $p < 0.0001$ ).



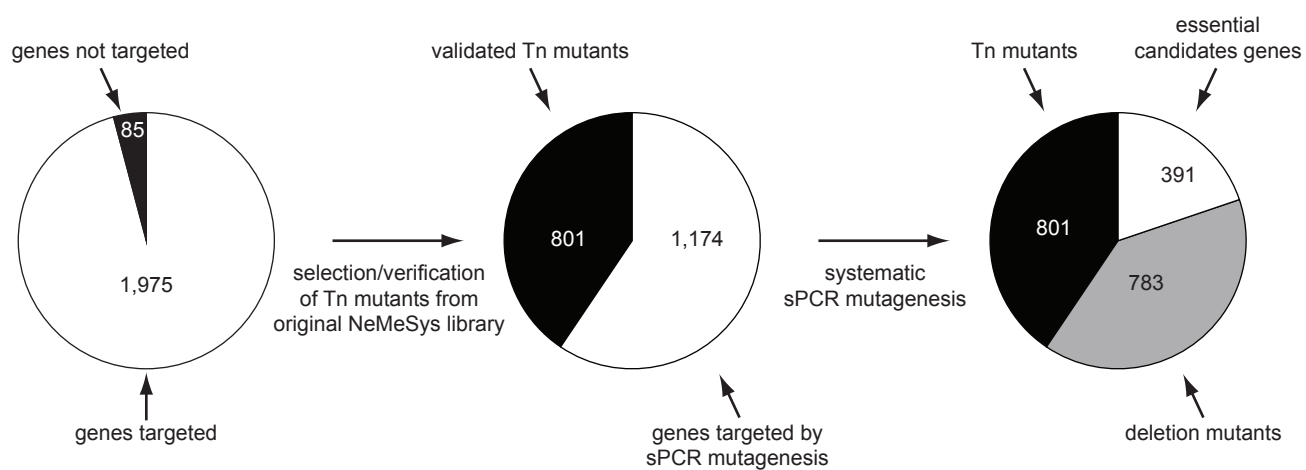

**Figure 1**

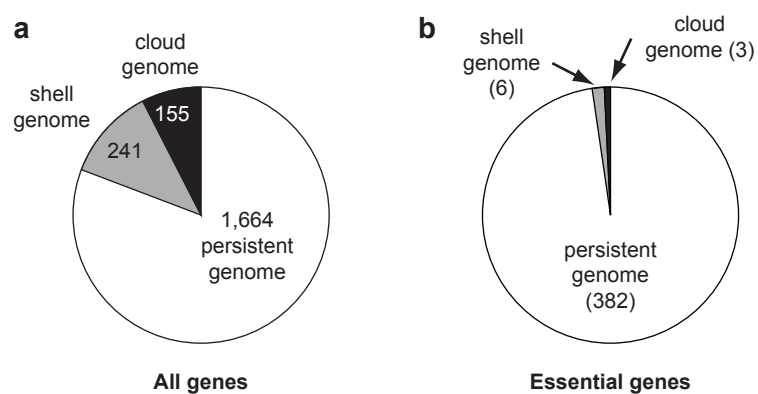

**Figure 2**

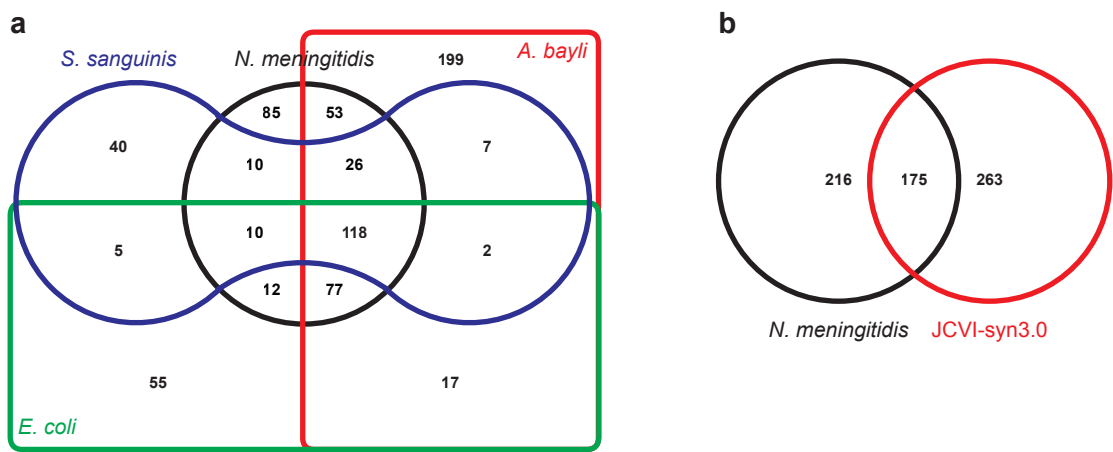

Figure 3

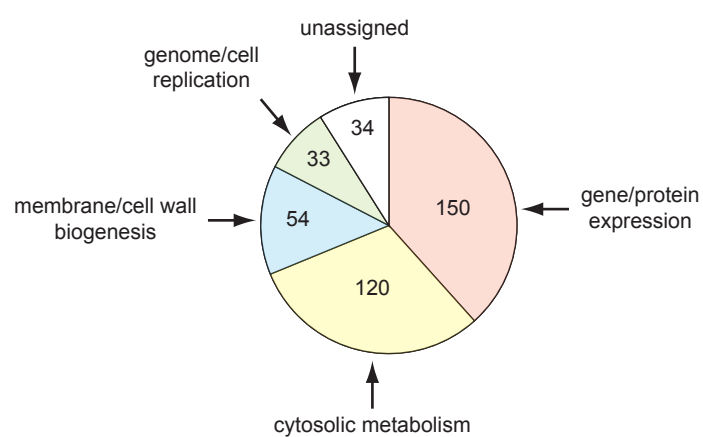

**Figure 4**

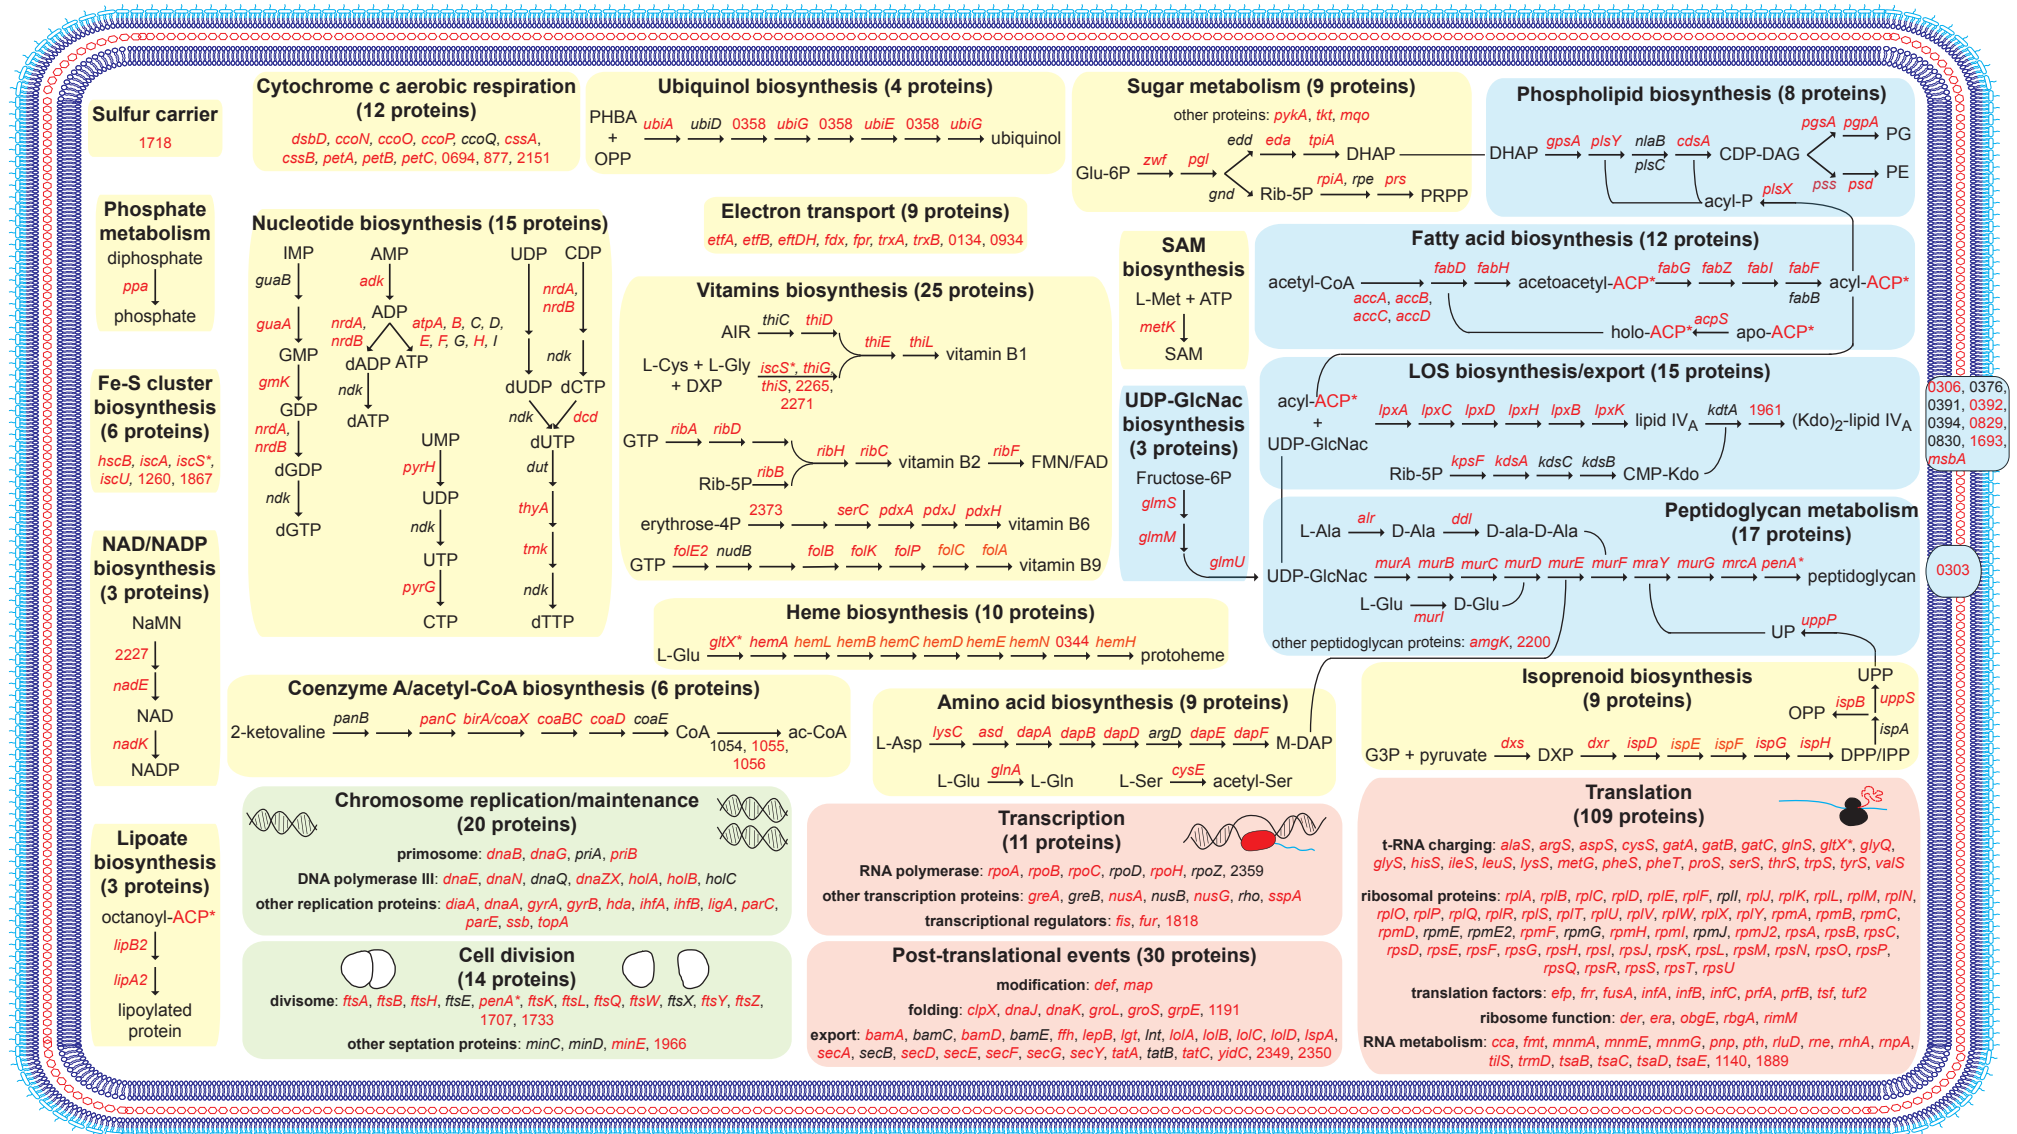

Figure 5

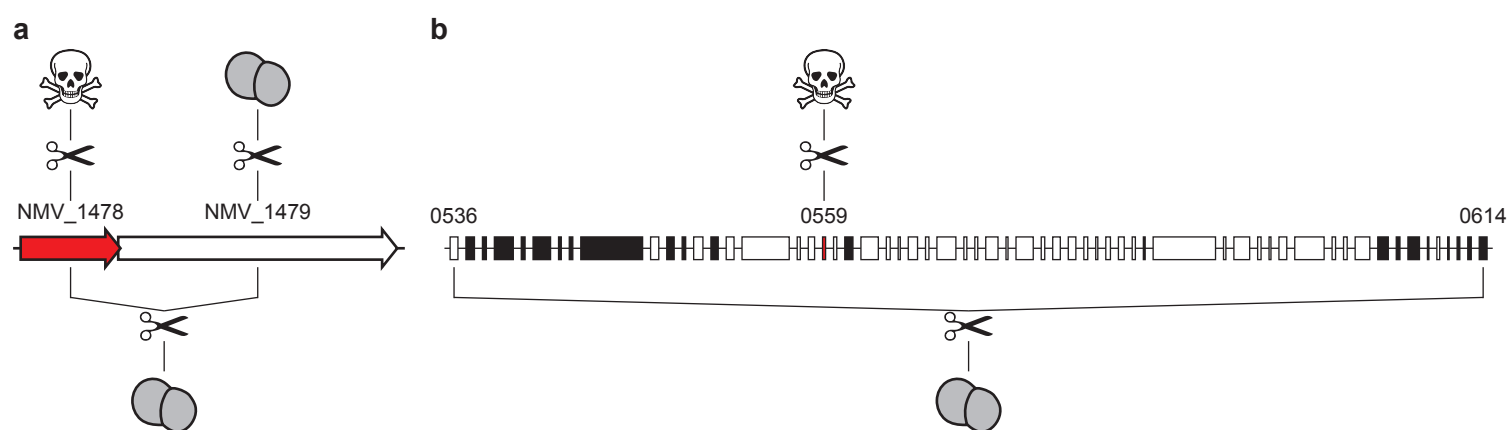

**Figure 6**

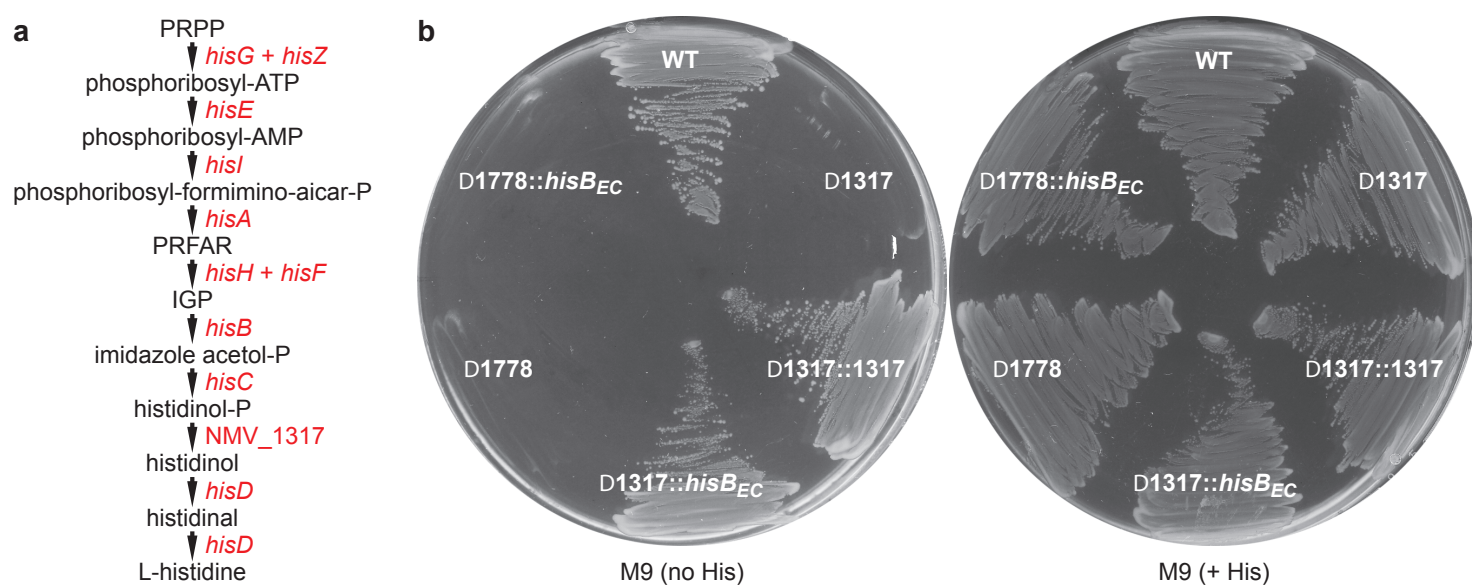

**Figure 7**

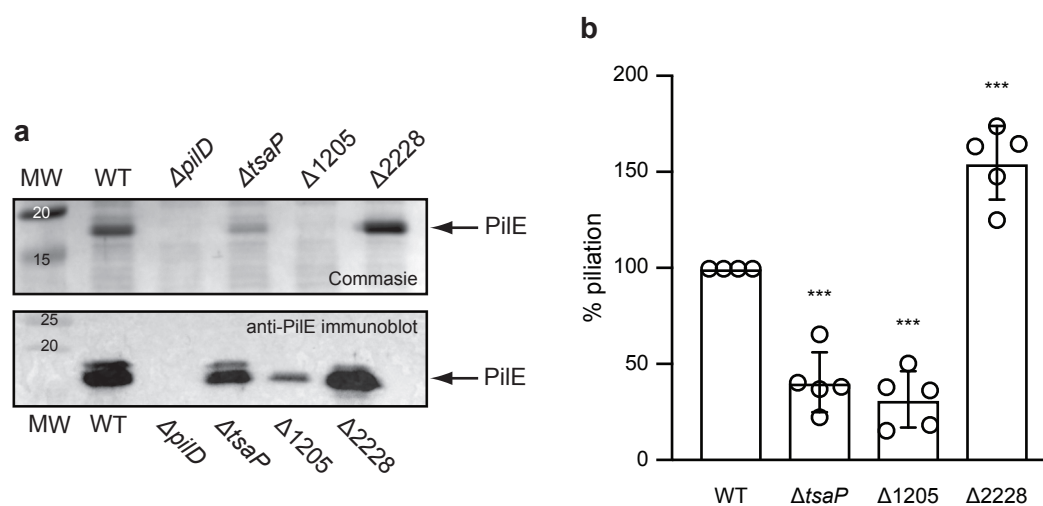

**Figure 8**



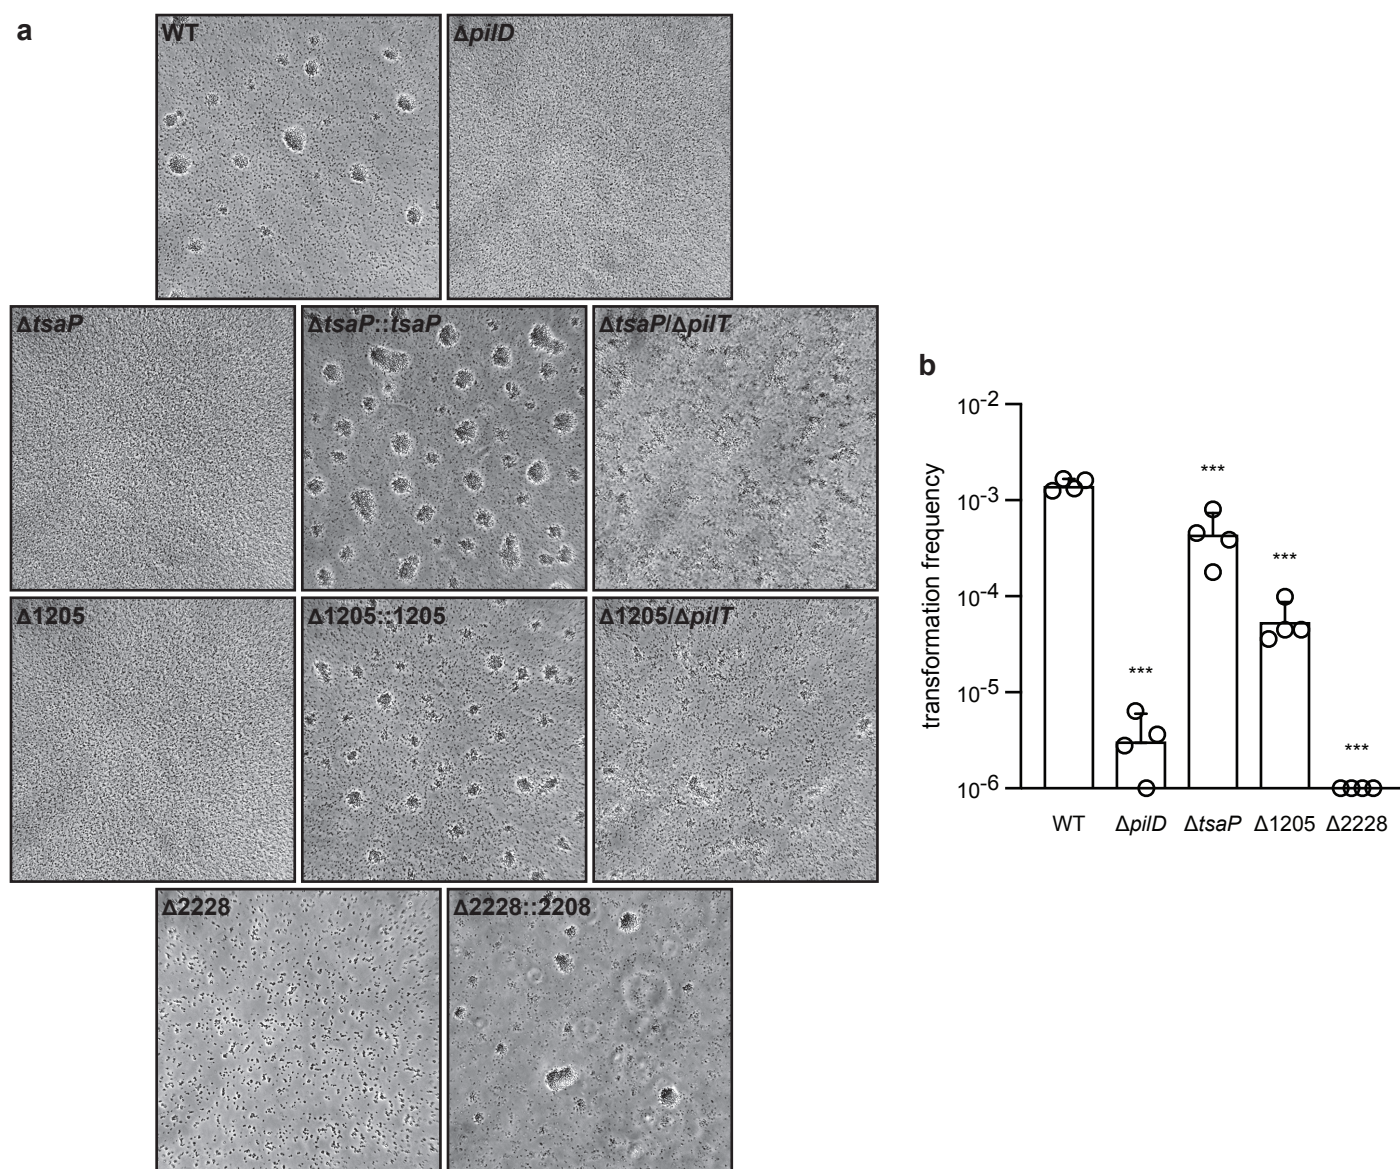

Figure 9
